# Supplementary material
Source: PubMed Central journal article supplement (PMC10103103)
Supplement: jasn-34-309-s001.pdf [file jasn-34-309-s001.pdf]

**Table S-1: Population characteristics of non-pregnant US adults ..... Page 2**

**Table S-2: GFR-dependent drug dosing adjustments for chronic kidney disease .... Page 3**

**Table S-3: Observed changes to GFR-dependent clinical decisions in NHANES (2001-2018)  
..... Page 4**

**Table S-4: Survey adjusted national projections of changes to GFR-dependent clinical decisions in the  
US, 2001-2018 ..... Page 9**

**Figure S-1. Secular trends in chronic kidney disease prevalence by race/ethnicity with new and prior  
GFR estimating equations, 2001-2018 ..... Page 14**

**Figure S-2. Enrichment of Black participants in eGFR development data affects CKD prevalence and  
pharmacologic recommendations for both Black and Non-Black individuals  
..... Page 16**

**Table S-1: Population characteristics of non-pregnant US adults****A. By Race/Ethnicity**

|                              | White       | Hispanic   | Black      | Asian/Other | Total       |
|------------------------------|-------------|------------|------------|-------------|-------------|
| NHANES 2001-2018—no.         | 18,598      | 11,812     | 9,522      | 4,428       | 44,360      |
| US Population Equivalent—no. | 154,416,741 | 32,604,393 | 26,603,289 | 16,486,364  | 230,110,787 |
| Age (IQR)—year               | 47 (27)     | 38 (23)    | 42 (26)    | 42 (25)     | 45 (26)     |
| Female—%                     | 50.5        | 48.8       | 54.2       | 50.9        | 50.7        |
| PIR (IQR)                    | 3.57 (3.1)  | 1.58 (2.0) | 1.88 (2.5) | 2.95 (3.5)  | 2.99 (3.5)  |
| Serum Cr (IQR)—mg/dL         | 0.86 (0.3)  | 0.77 (0.2) | 0.90 (0.3) | 0.80 (0.3)  | 0.85 (0.3)  |
| Urine ACR (IQR)—mg/g         | 6.2 (6.6)   | 6.7 (7.8)  | 6.2 (8.7)  | 6.5 (7.7)   | 6.3 (7.0)   |
| All Heart Disease—%          | 8.0         | 4.2        | 8.2        | 7.1         | 7.5         |
| Hypertension—%               | 44.4        | 32.9       | 52.0       | 40.8        | 43.4        |
| SBP (IQR)—mmHg               | 120 (20)    | 117 (20)   | 122 (24)   | 118 (20)    | 119 (20)    |
| DBP (IQR)—mmHg               | 72 (14)     | 70 (14)    | 72 (16)    | 72 (13)     | 72 (14)     |
| Obesity—%                    | 34.4        | 38.2       | 45.5       | 22.6        | 35.4        |
| BMI (IQR)—kg/m.sq            | 27.5 (8.1)  | 28.4 (7.4) | 29.2 (9.9) | 25.4 (7.1)  | 27.6 (8.2)  |
| Diabetes—%                   | 7.6         | 9.2        | 11.6       | 10.3        | 8.5         |
| Taking Insulin—%             | 2.2         | 2.2        | 3.5        | 1.9         | 2.3         |
| HbA1c (IQR)—%                | 5.4 (0.5)   | 5.4 (0.5)  | 5.5 (0.6)  | 5.5 (0.6)   | 5.4 (0.6)   |

**B. By Missingness of Serum Creatinine**

|                              | Missing    | Present     | Total       |
|------------------------------|------------|-------------|-------------|
| NHANES 2001-2018—no.         | 5,032      | 44,360      | 49,392      |
| US Population Equivalent—no. | 12,435,807 | 217,674,980 | 230,110,787 |
| Age (IQR)—year               | 40 (28)    | 45 (27)     | 45 (26)     |
| Female—%                     | 53.4       | 50.6        | 50.7        |
| PIR (IQR)                    | 2.43 (3.1) | 3.01 (3.5)  | 2.97 (3.5)  |
| Serum Cr (IQR)—mg/dL         | —          | 0.85 (0.3)  | 0.85 (0.3)  |
| Urine ACR (IQR)—mg/g         | 6.9 (9.1)  | 6.3 (7.0)   | 6.3 (7.1)   |
| All Heart Disease—%          | 7.4        | 7.5         | 7.5         |
| Hypertension—%               | 42.2       | 43.5        | 43.4        |
| SBP (IQR)—mmHg               | 120 (22)   | 119 (20)    | 120 (20)    |
| DBP (IQR)—mmHg               | 72 (14)    | 72 (14)     | 72 (14)     |
| Obesity—%                    | 34.8       | 35.5        | 35.5        |
| BMI (IQR)—kg/m.sq            | 27.3 (9.2) | 27.7 (8.2)  | 27.6 (8.3)  |
| Diabetes—%                   | 8.8        | 8.6         | 8.6         |
| Taking Insulin—%             | 2.8        | 2.4         | 2.4         |
| HbA1c (IQR)—%                | 5.5 (0.6)  | 5.4 (0.6)   | 5.4 (0.6)   |

**A.** The median and interquartile range is reported for several demographic characteristics, medical conditions, and laboratory values. Weights in each survey cycle were scaled to be representative of the U.S. population. Missing serum creatinine measurements were accounted for using stratified reweighting, where weights from respondents with missing values were redistributed evenly to respondents of the same race, gender, and age strata with recorded values.

**B.** Summary statistics on relevant demographic and medical characteristics were not significantly different between adults with and without serum creatinine values.

Abbreviations: ACR: albumin-creatinine ratio; BMI: body mass index; Cr: creatinine; DBP: diastolic blood pressure; HbA1c: glycohemoglobin, IQR: interquartile range; NHANES: National Health and Nutrition Examination Survey; PIR: poverty-income ratio, defined as the ratio of family income to poverty guidelines; SBP: systolic blood pressure.

**Table S-2: GFR-dependent drug dosing adjustments for chronic kidney disease**

| Drug                      | Class            | No. in NHANES | 0-24% Reduction | 24-49% Reduction | 50-99% Reduction | Contraindicated | Usual Dosage                                                    |
|---------------------------|------------------|---------------|-----------------|------------------|------------------|-----------------|-----------------------------------------------------------------|
| <b>Analgesics</b>         |                  |               |                 |                  |                  |                 |                                                                 |
| Codeine                   | Opioids          | 188           | 60+             | 0-60             |                  |                 | Not specified                                                   |
| Fentanyl                  | Opioids          | 33            | 60+             | 0-60             |                  |                 | Not specified                                                   |
| Hydrocodone               | Opioids          | 1238          | 60+             | 0-60             |                  |                 | Not specified                                                   |
| Hydromorphone             | Opioids          | 29            | 60+             | 0-60             |                  |                 | Not specified                                                   |
| Oxycodone                 | Opioids          | 495           | 60+             | 0-60             |                  |                 | Not specified                                                   |
| Oxymorphone               | Opioids          | 9             | 60+             | 0-60             |                  |                 | Not specified                                                   |
| Pentazocine               | Opioids          | 4             | 60+             | 0-60             |                  |                 | Not specified                                                   |
| Tapentadol                | Opioids          | 4             | 60+             | 0-60             |                  |                 | Not specified                                                   |
| Tramadol                  | Opioids          | 570           | 60+             | 0-60             |                  |                 | Not specified                                                   |
| <b>Antibiotics</b>        |                  |               |                 |                  |                  |                 |                                                                 |
| Cefaclor                  | Cephalosporins   | 6             | 50+             | 10-50            | 0-10             |                 | 250 to 500 mg every 8 hours                                     |
| Cefadroxil                | Cephalosporins   | 4             | 50+             | 10-50            | 0-10             |                 | 0.5 to 1 g every 12 hours                                       |
| Cefixime                  | Cephalosporins   | 1             | 50+             | 10-50            | 0-10             |                 | 200 mg every 12 hours                                           |
| Cefpodoxime               | Cephalosporins   | 1             | 50+             |                  | 0-50             |                 | 100 to 400 mg every 12 hours                                    |
| Cefprozil                 | Cephalosporins   | 2             | 50+             |                  | 0-50             |                 | 250 to 500 mg every 12 hours                                    |
| Cefuroxime                | Cephalosporins   | 17            | 10+             | 0-10             |                  |                 | 0.75 to 1.5 g every 8 hours                                     |
| Cephalexin                | Cephalosporins   | 150           | 10+             |                  | 0-10             |                 | 250 to 500 mg every 6 to 8 hours                                |
| Clarithromycin            | Macrolides       | 54            | 50+             | 10-50            | 0-10             |                 | 250 to 500 mg every 12 hours (Biaxin); 1 g daily (Biaxin XL)    |
| Nitrofurantoin            | Nitrofurans      | 83            | 50+             |                  |                  | 0-50            | 500 to 1,000 mg every 6 hours                                   |
| Amoxicillin               | Penicillins      | 408           | 10+             |                  |                  | 0-10            | 250 to 500 mg every 8 hours                                     |
| Ampicillin                | Penicillins      | 13            | 50+             | 10-50            | 0-10             |                 | 0.25 to 2 g every 6 hours                                       |
| Ampicillin/sulbactam      | Penicillins      | 13            | 50+             | 10-50            | 0-10             |                 | 1 to 2 g ampicillin and 0.5 to 1 g sulbactam every 6 to 8 hours |
| Ciprofloxacin             | Quinolones       | 139           | 50+             | 10-50            | 0-10             |                 | 400 mg IV or 500 to 750 mg orally every 12 hours                |
| Gatifloxacin              | Quinolones       | 10            | 50+             |                  | 0-50             |                 | 400 mg every 24 hours                                           |
| Gemifloxacin              | Quinolones       | 1             | 50+             | 10-50            | 0-10             |                 | 320 mg every 24 hours                                           |
| Levofloxacin              | Quinolones       | 53            | 50+             | 10-50            | 0-10             |                 | 250 to 750 mg every 24 hours                                    |
| Ofloxacin                 | Quinolones       | 6             | 50+             |                  | 0-50             |                 | 200 to 400 mg every 12 hours                                    |
| Sulfamethoxazole          | Sulfas           | 150           | 50+             | 10-50            | 0-10             |                 | 1 g every 8 to 12 hours                                         |
| Sulfisoxazole             | Sulfas           | 1             | 50+             | 10-50            | 0-10             |                 | 1 to 2 g every 6 hours                                          |
| Trimethoprim              | Sulfas           | 146           | 10+             |                  | 0-10             |                 | 100 mg every 12 hours                                           |
| Tetracycline              | Tetracyclines    | 39            | 50+             | 10-50            | 0-10             |                 | 250 to 500 mg two to four times daily                           |
| <b>Anticoagulant</b>      |                  |               |                 |                  |                  |                 |                                                                 |
| Enoxaparin                | LMWHs            | 5             | 30+             |                  |                  | 0-30            | Not specified                                                   |
| Warfarin                  | Coumarins        | 591           | 30+             |                  |                  | 0-30            | Not specified                                                   |
| <b>Anticonvulsants</b>    |                  |               |                 |                  |                  |                 |                                                                 |
| Gabapentin                | Gabapentinoids   | 825           | 60+             |                  |                  | 0-60            | 300 to 600 mg three times daily                                 |
| <b>Antihyperglycemics</b> |                  |               |                 |                  |                  |                 |                                                                 |
| Metformin                 | Biguanides       | 3051          | 30+             |                  |                  | 0-30            | Not specified                                                   |
| Canagliflozin             | SGLT2 inhibitors | 29            | 30+             |                  |                  | 0-30            | Not specified                                                   |
| Dapagliflozin             | SGLT2 inhibitors | 13            | 30+             |                  |                  | 0-30            | Not specified                                                   |
| Empagliflozin             | SGLT2 inhibitors | 13            | 30+             |                  |                  | 0-30            | Not specified                                                   |
| Chlorpropamide            | Sulfonylureas    | 9             | 50+             |                  |                  | 0-50            | 100 to 500 mg daily                                             |
| Gliclazide                | Sulfonylureas    | 1             | 30+             | 0-30             |                  |                 | Not specified                                                   |
| Glimepiride               | Sulfonylureas    | 359           | 60+             |                  |                  | 0-60            | Not specified                                                   |
| Glipizide                 | Sulfonylureas    | 882           | 60+             |                  |                  | 0-60            | Not specified                                                   |
| Glyburide                 | Sulfonylureas    | 532           | 60+             |                  |                  | 0-60            | Not specified                                                   |
| <b>Antihypertensives</b>  |                  |               |                 |                  |                  |                 |                                                                 |
| Benazepril                | ACE inhibitors   | 612           | 50+             | 10-50            | 0-10             |                 | 10 mg daily                                                     |
| Captopril                 | ACE inhibitors   | 99            | 50+             | 10-50            | 0-10             |                 | 25 mg every 8 hours                                             |
| Enalapril                 | ACE inhibitors   | 336           | 10+             |                  | 0-10             |                 | 5 to 10 mg every 12 hours                                       |
| Lisinopril                | ACE inhibitors   | 3426          | 50+             | 10-50            | 0-10             |                 | 5 to 10 mg daily                                                |
| Quinapril                 | ACE inhibitors   | 239           | 10+             | 0-10             |                  |                 | 10 to 20 mg daily                                               |
| Ramipril                  | ACE inhibitors   | 267           | 50+             | 10-50            | 0-10             |                 | 5 to 10 mg daily                                                |
| Candesartan               | ARBs             | 67            | 45+             | 0-45             |                  |                 | Not specified                                                   |
| Eprosartan                | ARBs             | 3             | 45+             | 0-45             |                  |                 | Not specified                                                   |
| Irbesartan                | ARBs             | 239           | 45+             | 0-45             |                  |                 | Not specified                                                   |
| Losartan                  | ARBs             | 1209          | 45+             | 0-45             |                  |                 | Not specified                                                   |
| Olmesartan                | ARBs             | 299           | 45+             | 0-45             |                  |                 | Not specified                                                   |
| Telmisartan               | ARBs             | 113           | 45+             | 0-45             |                  |                 | Not specified                                                   |
| Valsartan                 | ARBs             | 737           | 45+             | 0-45             |                  |                 | Not specified                                                   |
| Acebutolol                | Beta blockers    | 13            | 50+             |                  | 0-50             |                 | 400 to 600 mg once or twice daily                               |
| Atenolol                  | Beta blockers    | 1242          | 50+             |                  | 0-50             |                 | 5 to 100 mg daily                                               |
| Bisoprolol                | Beta blockers    | 107           | 50+             | 10-50            | 0-10             |                 | 10 mg daily                                                     |
| Nadolol                   | Beta blockers    | 36            | 50+             |                  | 0-50             |                 | 40 to 80 mg daily                                               |
| Amiloride                 | Diuretics        | 22            | 50+             |                  | 10-50            | 0-10            | 5 mg daily                                                      |
| Spironolactone            | Diuretics        | 281           | 50+             |                  | 10-50            | 0-10            | 50 to 100 mg daily                                              |
| Triamterene               | Diuretics        | 576           | 10+             |                  |                  | 0-10            | 50 to 100 twice daily                                           |
| Fluvastatin               | Statins          | 62            | 30+             |                  |                  | 0-30            | 20 to 80 mg daily (sustained release)                           |
| Pravastatin               | Statins          | 737           | 30+             | 0-30             |                  |                 | 10 to 20 mg daily; maximal dosage: 40 mg daily                  |
| Rosuvastatin              | Statins          | 535           | 30+             |                  | 0-30             |                 | 5 to 40 mg daily                                                |

Table of glomerular filtration rate (GFR)-dependent drug dosing and contraindication recommendations. Each drug with an adjustment across a GFR threshold is categorized into four groups: 0-24% Reduction, 25-49% Reduction, 50-99% Reduction, and Contraindication. When dose adjustment is expressed as a range (e.g., 30-50% reduction), the midpoint is used. Data are derived from the 2007 American Association of Family Physicians (AAFP) Annual Clinical Focus on Management of Chronic Illness and the 2012 Kidney Disease Improving Global Outcomes (KDIGO) Clinical Practice Guideline for the Evaluation and Management of Chronic Kidney Disease. Drugs in the following classes were derived from KDIGO guidelines: opioids, low-molecular-weight-heparins (LMWHs), warfarin, metformin, sodium-glucose cotransporter-2 (SGLT2) inhibitors, sulfonylureas besides chlorpropamide, and angiotensin-II receptor blockers (ARBs). The remainder were derived from AAFP guidelines. Tabulated drugs with GFR thresholds of less than 30 ml/min/1.73 m<sup>2</sup> did not contribute to any observed changes and are not listed.

**Table S-3: Observed changes to GFR-dependent clinical decisions in NHANES (2001-2018)**

**A. Among Black Adults, from 2006 MDRD**

| Implication                           | GFR Thresholds           | 2006 MDRD      | 2021 CKD-EPI   | Difference           | % Change             |
|---------------------------------------|--------------------------|----------------|----------------|----------------------|----------------------|
|                                       | <i>ml/min/1.73 m.sq.</i> | <i>no. (%)</i> | <i>no. (%)</i> | <i>no. (95% CI)</i>  | <i>% (95% CI)</i>    |
| Chronic Kidney Disease Diagnosis      | <60                      | 1,638 (17.202) | 1,843 (19.355) | 205 (167.66, 242.34) | 12.52 (10.57, 14.46) |
| Ineligible to Donate Kidney           | <60                      | 3,849 (40.422) | 3,967 (41.661) | 118 (92.07, 143.93)  | 3.07 (2.49, 3.65)    |
| Dose Reduction for Any Drug           | <30, <45, <50, <60       | 269 (2.825)    | 374 (3.928)    | 105 (82.83, 127.17)  | 39.03 (29.87, 48.2)  |
| Medical Nutrition Therapy Covered     | 13-50                    | 198 (2.079)    | 296 (3.109)    | 98 (78.9, 117.1)     | 49.49 (38.35, 60.64) |
| Dose Reduction for ACE Inhibitors     | <50                      | 95 (0.998)     | 137 (1.439)    | 42 (30.24, 53.76)    | 44.21 (29.42, 59)    |
| Dose Reduction for Opioids            | <60                      | 68 (0.714)     | 94 (0.987)     | 26 (16.4, 35.6)      | 38.24 (22.64, 53.83) |
| Dose Reduction for Antihyperglycemics | <30, <50, <60            | 44 (0.462)     | 58 (0.609)     | 14 (6.67, 21.33)     | 31.82 (11.79, 51.85) |
| Dose Reduction for ARBs               | <45                      | 61 (0.641)     | 84 (0.882)     | 23 (13.6, 32.4)      | 37.7 (20.26, 55.15)  |
| Dose Reduction for Anticonvulsants    | <60                      | 39 (0.410)     | 47 (0.494)     | 8 (3.2, 12.8)        | 20.51 (8.64, 32.38)  |
| Dose Reduction for Beta-Blockers      | <50                      | 24 (0.252)     | 31 (0.326)     | 7 (1.81, 12.19)      | 29.17 (4.15, 54.18)  |
| Kidney Disease Education Covered      | 15-29                    | 28 (0.294)     | 41 (0.431)     | 13 (2.82, 23.18)     | 46.43 (1.29, 91.56)  |
| Nephrologist Referral                 | <30                      | 350 (3.676)    | 370 (3.886)    | 20 (10.4, 29.6)      | 5.71 (2.92, 8.51)    |
| Dose Reduction for Antibacterials     | <50                      | 11 (0.116)     | 13 (0.137)     | 2 (-0.77, 4.77)      | 18.18 (-8.83, 45.19) |
| Eligible for Kidney Transplant        | <20                      | 70 (0.735)     | 79 (0.830)     | 9 (2.5, 15.5)        | 12.86 (3.31, 22.41)  |
| Dose Reduction for Anticoagulants     | <30                      | 8 (0.084)      | 11 (0.116)     | 3 (-0.39, 6.39)      | 37.5 (-12.26, 87.26) |
| Dose Reduction for Diuretics          | <30                      | 23 (0.242)     | 29 (0.305)     | 6 (1.2, 10.8)        | 26.09 (0.69, 51.48)  |
| Pre-emptive Arteriovenous Fistula     | <18                      | 65 (0.683)     | 73 (0.767)     | 8 (2.46, 13.54)      | 12.31 (3.99, 20.63)  |
| Dose Reduction for Statins            | <30                      | 16 (0.168)     | 19 (0.200)     | 3 (-0.39, 6.39)      | 18.75 (-5.56, 43.06) |

**B. Among Black Adults, from 2009 CKD-EPI**

| Implication                           | GFR Thresholds           | 2009 CKD-EPI   | 2021 CKD-EPI   | Difference           | % Change             |
|---------------------------------------|--------------------------|----------------|----------------|----------------------|----------------------|
|                                       | <i>ml/min/1.73 m.sq.</i> | <i>no. (%)</i> | <i>no. (%)</i> | <i>no. (95% CI)</i>  | <i>% (95% CI)</i>    |
| Chronic Kidney Disease Diagnosis      | <60                      | 1,658 (17.412) | 1,843 (19.355) | 185 (150.66, 219.34) | 11.16 (9.33, 12.98)  |
| Ineligible to Donate Kidney           | <60                      | 3,852 (40.454) | 3,967 (41.661) | 115 (91.16, 138.84)  | 2.98 (2.44, 3.53)    |
| Dose Reduction for Any Drug           | <30, <45, <50, <60       | 291 (3.056)    | 374 (3.928)    | 83 (60.65, 105.35)   | 28.52 (20.18, 36.87) |
| Medical Nutrition Therapy Covered     | 13-50                    | 234 (2.457)    | 296 (3.109)    | 62 (46.44, 77.56)    | 26.5 (19.46, 33.53)  |
| Dose Reduction for ACE Inhibitors     | <50                      | 111 (1.166)    | 137 (1.439)    | 26 (15.26, 36.74)    | 23.42 (13.05, 33.79) |
| Dose Reduction for Opioids            | <60                      | 69 (0.725)     | 94 (0.987)     | 25 (15.6, 34.4)      | 36.23 (21.59, 50.88) |
| Dose Reduction for Antihyperglycemics | <30, <50, <60            | 46 (0.483)     | 58 (0.609)     | 12 (5.21, 18.79)     | 26.09 (9.51, 42.67)  |
| Dose Reduction for ARBs               | <45                      | 64 (0.672)     | 84 (0.882)     | 20 (11.23, 28.77)    | 31.25 (15.68, 46.82) |
| Dose Reduction for Anticonvulsants    | <60                      | 40 (0.420)     | 47 (0.494)     | 7 (2.62, 11.38)      | 17.5 (6.62, 28.38)   |
| Dose Reduction for Beta-Blockers      | <50                      | 27 (0.284)     | 31 (0.326)     | 4 (0.08, 7.92)       | 14.81 (-0.89, 30.52) |
| Kidney Disease Education Covered      | 15-29                    | 35 (0.368)     | 41 (0.431)     | 6 (-1.84, 13.84)     | 17.14 (-7.1, 41.39)  |
| Nephrologist Referral                 | <30                      | 359 (3.770)    | 370 (3.886)    | 11 (3.93, 18.07)     | 3.06 (1.09, 5.04)    |
| Dose Reduction for Antibacterials     | <50                      | 11 (0.116)     | 13 (0.137)     | 2 (-0.77, 4.77)      | 18.18 (-8.83, 45.19) |
| Eligible for Kidney Transplant        | <20                      | 75 (0.788)     | 79 (0.830)     | 4 (0.08, 7.92)       | 5.33 (0.06, 10.61)   |
| Dose Reduction for Anticoagulants     | <30                      | 10 (0.105)     | 11 (0.116)     | 1 (-0.96, 2.96)      | 10 (-10.56, 30.56)   |
| Dose Reduction for Diuretics          | <30                      | 23 (0.242)     | 29 (0.305)     | 6 (1.2, 10.8)        | 26.09 (1.65, 50.52)  |
| Pre-emptive Arteriovenous Fistula     | <18                      | 65 (0.683)     | 73 (0.767)     | 8 (2.46, 13.54)      | 12.31 (3.69, 20.92)  |
| Dose Reduction for Statins            | <30                      | 18 (0.189)     | 19 (0.200)     | 1 (-0.96, 2.96)      | 5.56 (-5.6, 16.71)   |

### C. Among Non-Black Adults, from 2006 MDRD

| Implication                           | GFR Thresholds           | 2006 MDRD       | 2021 CKD-EPI    | Difference              | % Change                |
|---------------------------------------|--------------------------|-----------------|-----------------|-------------------------|-------------------------|
|                                       | <i>ml/min/1.73 m.sq.</i> | <i>no. (%)</i>  | <i>no. (%)</i>  | <i>no. (95% CI)</i>     | <i>% (95% CI)</i>       |
| Chronic Kidney Disease Diagnosis      | <60                      | 5,657 (16.238)  | 4,789 (13.746)  | -868 (-943.6, -792.4)   | -15.34 (-16.44, -14.24) |
| Ineligible to Donate Kidney           | <60                      | 11,027 (31.652) | 10,415 (29.896) | -612 (-672.7, -551.3)   | -5.55 (-6.04, -5.06)    |
| Dose Reduction for Any Drug           | <30, <45, <50, <60       | 957 (2.747)     | 680 (1.952)     | -277 (-314.95, -239.05) | -28.94 (-31.83, -26.06) |
| Medical Nutrition Therapy Covered     | 13-50                    | 847 (2.431)     | 611 (1.754)     | -236 (-272.93, -199.07) | -27.86 (-31.2, -24.53)  |
| Dose Reduction for ACE Inhibitors     | <50                      | 320 (0.919)     | 226 (0.649)     | -94 (-113.6, -74.4)     | -29.38 (-34.35, -24.4)  |
| Dose Reduction for Opioids            | <60                      | 242 (0.695)     | 164 (0.471)     | -78 (-96.8, -59.2)      | -32.23 (-37.97, -26.5)  |
| Dose Reduction for Antihyperglycemics | <30, <50, <60            | 166 (0.476)     | 119 (0.342)     | -47 (-59.85, -34.15)    | -28.31 (-34.62, -22.01) |
| Dose Reduction for ARBs               | <45                      | 159 (0.456)     | 127 (0.365)     | -32 (-45, -19)          | -20.13 (-27.67, -12.58) |
| Dose Reduction for Anticonvulsants    | <60                      | 142 (0.408)     | 95 (0.273)      | -47 (-60.15, -33.85)    | -33.1 (-41.53, -24.66)  |
| Dose Reduction for Beta-Blockers      | <50                      | 139 (0.399)     | 98 (0.281)      | -41 (-53.24, -28.76)    | -29.5 (-36.19, -22.81)  |
| Kidney Disease Education Covered      | 15-29                    | 93 (0.267)      | 72 (0.207)      | -21 (-30.8, -11.2)      | -22.58 (-31.14, -14.02) |
| Nephrologist Referral                 | <30                      | 1,228 (3.525)   | 1,210 (3.473)   | -18 (-26.32, -9.68)     | -1.47 (-2.14, -0.8)     |
| Dose Reduction for Antibacterials     | <50                      | 30 (0.0861)     | 23 (0.066)      | -7 (-12.19, -1.81)      | -23.33 (-38.11, -8.55)  |
| Eligible for Kidney Transplant        | <20                      | 90 (0.258)      | 80 (0.230)      | -10 (-16.2, -3.8)       | -11.11 (-17.75, -4.47)  |
| Dose Reduction for Anticoagulants     | <30                      | 19 (0.0545)     | 16 (0.0459)     | -3 (-6.39, 0.39)        | -15.79 (-32.87, 1.29)   |
| Dose Reduction for Diuretics          | <30                      | 52 (0.149)      | 41 (0.118)      | -11 (-18.07, -3.93)     | -21.15 (-32.67, -9.64)  |
| Pre-emptive Arteriovenous Fistula     | <18                      | 76 (0.218)      | 70 (0.201)      | -6 (-10.8, -1.2)        | -7.89 (-14.22, -1.57)   |
| Dose Reduction for Statins            | <30                      | 14 (0.0402)     | 11 (0.0316)     | -3 (-6.39, 0.39)        | -21.43 (-42.92, 0.07)   |

### D. Among Non-Black Adults, from 2009 CKD-EPI

| Implication                           | GFR Thresholds           | 2009 CKD-EPI    | 2021 CKD-EPI    | Difference              | % Change                |
|---------------------------------------|--------------------------|-----------------|-----------------|-------------------------|-------------------------|
|                                       | <i>ml/min/1.73 m.sq.</i> | <i>no. (%)</i>  | <i>no. (%)</i>  | <i>no. (95% CI)</i>     | <i>% (95% CI)</i>       |
| Chronic Kidney Disease Diagnosis      | <60                      | 5,281 (15.159)  | 4,789 (13.746)  | -492 (-540.68, -443.32) | -9.32 (-10.11, -8.52)   |
| Ineligible to Donate Kidney           | <60                      | 10,770 (30.915) | 10,415 (29.896) | -355 (-396.11, -313.89) | -3.3 (-3.64, -2.96)     |
| Dose Reduction for Any Drug           | <30, <45, <50, <60       | 885 (2.540)     | 680 (1.952)     | -205 (-238.55, -171.45) | -23.16 (-26.07, -20.26) |
| Medical Nutrition Therapy Covered     | 13-50                    | 846 (2.428)     | 611 (1.754)     | -235 (-270.01, -199.99) | -27.78 (-31, -24.55)    |
| Dose Reduction for ACE Inhibitors     | <50                      | 305 (0.875)     | 226 (0.649)     | -79 (-96.86, -61.14)    | -25.9 (-30.7, -21.1)    |
| Dose Reduction for Opioids            | <60                      | 204 (0.586)     | 164 (0.471)     | -40 (-53.86, -26.14)    | -19.61 (-25.32, -13.89) |
| Dose Reduction for Antihyperglycemics | <30, <50, <60            | 151 (0.433)     | 119 (0.342)     | -32 (-42.74, -21.26)    | -21.19 (-27.29, -15.09) |
| Dose Reduction for ARBs               | <45                      | 160 (0.459)     | 127 (0.365)     | -33 (-45.55, -20.45)    | -20.62 (-27.86, -13.38) |
| Dose Reduction for Anticonvulsants    | <60                      | 119 (0.342)     | 95 (0.273)      | -24 (-33.99, -14.01)    | -20.17 (-28.44, -11.9)  |
| Dose Reduction for Beta-Blockers      | <50                      | 131 (0.376)     | 98 (0.281)      | -33 (-43.18, -22.82)    | -25.19 (-31.32, -19.06) |
| Kidney Disease Education Covered      | 15-29                    | 100 (0.287)     | 72 (0.207)      | -28 (-40.4, -15.6)      | -28 (-37.98, -18.02)    |
| Nephrologist Referral                 | <30                      | 1,241 (3.562)   | 1,210 (3.473)   | -31 (-43.55, -18.45)    | -2.5 (-3.48, -1.52)     |
| Dose Reduction for Antibacterials     | <50                      | 28 (0.0804)     | 23 (0.066)      | -5 (-9.38, -0.62)       | -17.86 (-31.64, -4.07)  |
| Eligible for Kidney Transplant        | <20                      | 94 (0.270)      | 80 (0.230)      | -14 (-21.33, -6.67)     | -14.89 (-21.86, -7.92)  |
| Dose Reduction for Anticoagulants     | <30                      | 20 (0.0574)     | 16 (0.0459)     | -4 (-7.92, -0.08)       | -20 (-38.18, -1.82)     |
| Dose Reduction for Diuretics          | <30                      | 53 (0.152)      | 41 (0.118)      | -12 (-19.33, -4.67)     | -22.64 (-34.06, -11.22) |
| Pre-emptive Arteriovenous Fistula     | <18                      | 78 (0.224)      | 70 (0.201)      | -8 (-12.8, -3.2)        | -10.26 (-16.52, -3.99)  |
| Dose Reduction for Statins            | <30                      | 15 (0.0431)     | 11 (0.0316)     | -4 (-7.92, -0.08)       | -26.67 (-49.05, -4.29)  |

### E. Among White Adults, from 2006 MDRD

| Implication                           | GFR Thresholds           | 2006 MDRD      | 2021 CKD-EPI   | Difference              | % Change                |
|---------------------------------------|--------------------------|----------------|----------------|-------------------------|-------------------------|
|                                       | <i>ml/min/1.73 m.sq.</i> | <i>no. (%)</i> | <i>no. (%)</i> | <i>no. (95% CI)</i>     | <i>% (95% CI)</i>       |
| Chronic Kidney Disease Diagnosis      | <60                      | 3,321 (17.857) | 2,672 (14.367) | -649 (-723.68, -574.32) | -19.54 (-21.03, -18.06) |
| Ineligible to Donate Kidney           | <60                      | 6,158 (33.111) | 5,687 (30.579) | -471 (-529.8, -412.2)   | -7.65 (-8.41, -6.88)    |
| Dose Reduction for Any Drug           | <30, <45, <50, <60       | 657 (3.533)    | 469 (2.522)    | -188 (-219.48, -156.52) | -28.61 (-32.01, -25.22) |
| Medical Nutrition Therapy Covered     | 13-50                    | 635 (3.414)    | 456 (2.452)    | -179 (-211.32, -146.68) | -28.19 (-32.12, -24.26) |
| Dose Reduction for ACE Inhibitors     | <50                      | 221 (1.188)    | 159 (0.855)    | -62 (-77.92, -46.08)    | -28.05 (-34.06, -22.05) |
| Dose Reduction for Opioids            | <60                      | 176 (0.946)    | 122 (0.656)    | -54 (-70.63, -37.37)    | -30.68 (-37.55, -23.81) |
| Dose Reduction for Antihyperglycemics | <30, <50, <60            | 103 (0.554)    | 76 (0.409)     | -27 (-37.18, -16.82)    | -26.21 (-34.52, -17.91) |
| Dose Reduction for ARBs               | <45                      | 95 (0.511)     | 70 (0.376)     | -25 (-35.55, -14.45)    | -26.32 (-35.72, -16.91) |
| Dose Reduction for Anticonvulsants    | <60                      | 101 (0.543)    | 70 (0.376)     | -31 (-42.26, -19.74)    | -30.69 (-40.1, -21.29)  |
| Dose Reduction for Beta-Blockers      | <50                      | 103 (0.554)    | 73 (0.393)     | -30 (-40.37, -19.63)    | -29.13 (-36.26, -21.99) |
| Kidney Disease Education Covered      | 15-29                    | 60 (0.323)     | 44 (0.237)     | -16 (-23.84, -8.16)     | -26.67 (-36.61, -16.73) |
| Nephrologist Referral                 | <30                      | 665 (3.576)    | 653 (3.511)    | -12 (-19.33, -4.67)     | -1.8 (-2.91, -0.7)      |
| Dose Reduction for Antibacterials     | <50                      | 23 (0.124)     | 17 (0.0914)    | -6 (-10.8, -1.2)        | -26.09 (-43.24, -8.94)  |
| Eligible for Kidney Transplant        | <20                      | 38 (0.204)     | 37 (0.199)     | -1 (-2.96, 0.96)        | -2.63 (-7.73, 2.46)     |
| Dose Reduction for Anticoagulants     | <30                      | 13 (0.0699)    | 11 (0.0591)    | -2 (-4.77, 0.77)        | -15.38 (-36.3, 5.43)    |
| Dose Reduction for Diuretics          | <30                      | 36 (0.194)     | 31 (0.167)     | -5 (-10.19, 0.19)       | -13.89 (-25.81, -1.97)  |
| Pre-emptive Arteriovenous Fistula     | <18                      | 33 (0.177)     | 32 (0.172)     | -1 (-2.96, 0.96)        | -3.03 (-8.89, 2.84)     |
| Dose Reduction for Statins            | <30                      | 8 (0.043)      | 7 (0.0376)     | -1 (-2.96, 0.96)        | -12.5 (-35.42, 10.42)   |

### F. Among White Adults, from 2009 CKD-EPI

| Implication                           | GFR Thresholds           | 2009 CKD-EPI   | 2021 CKD-EPI   | Difference              | % Change                |
|---------------------------------------|--------------------------|----------------|----------------|-------------------------|-------------------------|
|                                       | <i>ml/min/1.73 m.sq.</i> | <i>no. (%)</i> | <i>no. (%)</i> | <i>no. (95% CI)</i>     | <i>% (95% CI)</i>       |
| Chronic Kidney Disease Diagnosis      | <60                      | 3,055 (16.426) | 2,672 (14.367) | -383 (-431.13, -334.87) | -12.54 (-13.67, -11.4)  |
| Ineligible to Donate Kidney           | <60                      | 5,972 (32.111) | 5,687 (30.579) | -285 (-325.12, -244.88) | -4.77 (-5.3, -4.25)     |
| Dose Reduction for Any Drug           | <30, <45, <50, <60       | 609 (3.275)    | 469 (2.522)    | -140 (-166.66, -113.34) | -22.99 (-26.33, -19.64) |
| Medical Nutrition Therapy Covered     | 13-50                    | 636 (3.420)    | 456 (2.452)    | -180 (-209.98, -150.02) | -28.3 (-31.99, -24.61)  |
| Dose Reduction for ACE Inhibitors     | <50                      | 211 (1.135)    | 159 (0.855)    | -52 (-66.4, -37.6)      | -24.64 (-30.38, -18.91) |
| Dose Reduction for Opioids            | <60                      | 149 (0.801)    | 122 (0.656)    | -27 (-39.4, -14.6)      | -18.12 (-25.32, -10.92) |
| Dose Reduction for Antihyperglycemics | <30, <50, <60            | 97 (0.522)     | 76 (0.409)     | -21 (-29.54, -12.46)    | -21.65 (-29.44, -13.86) |
| Dose Reduction for ARBs               | <45                      | 96 (0.516)     | 70 (0.376)     | -26 (-36.37, -15.63)    | -27.08 (-36.27, -17.89) |
| Dose Reduction for Anticonvulsants    | <60                      | 87 (0.468)     | 70 (0.376)     | -17 (-25.08, -8.92)     | -19.54 (-28.29, -10.8)  |
| Dose Reduction for Beta-Blockers      | <50                      | 98 (0.527)     | 73 (0.393)     | -25 (-33.98, -16.02)    | -25.51 (-32.39, -18.63) |
| Kidney Disease Education Covered      | 15-29                    | 65 (0.349)     | 44 (0.237)     | -21 (-31.18, -10.82)    | -32.31 (-44.3, -20.32)  |
| Nephrologist Referral                 | <30                      | 675 (3.629)    | 653 (3.511)    | -22 (-33.09, -10.91)    | -3.26 (-4.86, -1.66)    |
| Dose Reduction for Antibacterials     | <50                      | 21 (0.113)     | 17 (0.0914)    | -4 (-7.92, -0.08)       | -19.05 (-35.02, -3.07)  |
| Eligible for Kidney Transplant        | <20                      | 42 (0.226)     | 37 (0.199)     | -5 (-9.38, -0.62)       | -11.9 (-21.53, -2.28)   |
| Dose Reduction for Anticoagulants     | <30                      | 14 (0.0753)    | 11 (0.0591)    | -3 (-6.39, 0.39)        | -21.43 (-44.01, 1.15)   |
| Dose Reduction for Diuretics          | <30                      | 37 (0.199)     | 31 (0.167)     | -6 (-11.54, -0.46)      | -16.22 (-28.08, -4.35)  |
| Pre-emptive Arteriovenous Fistula     | <18                      | 36 (0.194)     | 32 (0.172)     | -4 (-7.92, -0.08)       | -11.11 (-21.76, -0.46)  |
| Dose Reduction for Statins            | <30                      | 9 (0.0484)     | 7 (0.0376)     | -2 (-4.77, 0.77)        | -22.22 (-49.38, 4.94)   |

### G. Among Hispanic Adults, from 2006 MDRD

| Implication                           | GFR Thresholds           | 2006 MDRD      | 2021 CKD-EPI   | Difference              | % Change                 |
|---------------------------------------|--------------------------|----------------|----------------|-------------------------|--------------------------|
|                                       | <i>ml/min/1.73 m.sq.</i> | <i>no. (%)</i> | <i>no. (%)</i> | <i>no. (95% CI)</i>     | <i>% (95% CI)</i>        |
| Chronic Kidney Disease Diagnosis      | <60                      | 1,741 (14.739) | 1,585 (13.419) | -156 (-189.15, -122.85) | -8.96 (-10.28, -7.64)    |
| Ineligible to Donate Kidney           | <60                      | 3,746 (31.714) | 3,642 (30.833) | -104 (-129.78, -78.22)  | -2.78 (-3.33, -2.22)     |
| Dose Reduction for Any Drug           | <30, <45, <50, <60       | 217 (1.837)    | 150 (1.270)    | -67 (-86.5, -47.5)      | -30.88 (-37.78, -23.97)  |
| Medical Nutrition Therapy Covered     | 13-50                    | 152 (1.287)    | 111 (0.940)    | -41 (-56.8, -25.2)      | -26.97 (-34.34, -19.61)  |
| Dose Reduction for ACE Inhibitors     | <50                      | 76 (0.643)     | 50 (0.423)     | -26 (-37.09, -14.91)    | -34.21 (-44.73, -23.69)  |
| Dose Reduction for Opioids            | <60                      | 45 (0.381)     | 26 (0.220)     | -19 (-27.98, -10.02)    | -42.22 (-57.06, -27.38)  |
| Dose Reduction for Antihyperglycemics | <30, <50, <60            | 48 (0.406)     | 34 (0.288)     | -14 (-20.79, -7.21)     | -29.17 (-40.74, -17.6)   |
| Dose Reduction for ARBs               | <45                      | 47 (0.398)     | 40 (0.339)     | -7 (-12.19, -1.81)      | -14.89 (-25.6, -4.19)    |
| Dose Reduction for Anticonvulsants    | <60                      | 30 (0.254)     | 17 (0.144)     | -13 (-19.5, -6.5)       | -43.33 (-64.97, -21.69)  |
| Dose Reduction for Beta-Blockers      | <50                      | 24 (0.203)     | 18 (0.152)     | -6 (-11.54, -0.46)      | -25 (-45, -5)            |
| Kidney Disease Education Covered      | 15-29                    | 24 (0.203)     | 22 (0.186)     | -2 (-5.92, 1.92)        | -8.33 (-23.67, 7)        |
| Nephrologist Referral                 | <30                      | 433 (3.666)    | 430 (3.640)    | -3 (-6.39, 0.39)        | -0.69 (-1.45, 0.06)      |
| Dose Reduction for Antibacterials     | <50                      | 7 (0.0593)     | 6 (0.0508)     | -1 (-2.96, 0.96)        | -14.29 (-40.21, 11.64)   |
| Eligible for Kidney Transplant        | <20                      | 39 (0.330)     | 32 (0.271)     | -7 (-12.19, -1.81)      | -17.95 (-30.72, -5.17)   |
| Dose Reduction for Anticoagulants     | <30                      | 4 (0.0339)     | 4 (0.0339)     | —                       | —                        |
| Dose Reduction for Diuretics          | <30                      | 12 (0.102)     | 7 (0.0593)     | -5 (-9.38, -0.62)       | -41.67 (-71.17, -12.16)  |
| Pre-emptive Arteriovenous Fistula     | <18                      | 32 (0.271)     | 28 (0.237)     | -4 (-8.8, 0.8)          | -12.5 (-26.95, 1.95)     |
| Dose Reduction for Statins            | <30                      | 3 (0.0254)     | 1 (0.00847)    | -2 (-4.77, 0.77)        | -66.67 (-120.01, -13.32) |

### H. Among Hispanic Adults, from 2009 CKD-EPI

| Implication                           | GFR Thresholds           | 2009 CKD-EPI   | 2021 CKD-EPI   | Difference           | % Change                 |
|---------------------------------------|--------------------------|----------------|----------------|----------------------|--------------------------|
|                                       | <i>ml/min/1.73 m.sq.</i> | <i>no. (%)</i> | <i>no. (%)</i> | <i>no. (95% CI)</i>  | <i>% (95% CI)</i>        |
| Chronic Kidney Disease Diagnosis      | <60                      | 1,661 (14.062) | 1,585 (13.419) | -76 (-98, -54)       | -4.58 (-5.57, -3.58)     |
| Ineligible to Donate Kidney           | <60                      | 3,696 (31.290) | 3,642 (30.833) | -54 (-72.49, -35.51) | -1.46 (-1.87, -1.05)     |
| Dose Reduction for Any Drug           | <30, <45, <50, <60       | 200 (1.693)    | 150 (1.270)    | -50 (-67.96, -32.04) | -25 (-32.09, -17.91)     |
| Medical Nutrition Therapy Covered     | 13-50                    | 151 (1.278)    | 111 (0.940)    | -40 (-56.4, -23.6)   | -26.49 (-34.23, -18.75)  |
| Dose Reduction for ACE Inhibitors     | <50                      | 72 (0.610)     | 50 (0.423)     | -22 (-31.99, -12.01) | -30.56 (-40.96, -20.15)  |
| Dose Reduction for Opioids            | <60                      | 38 (0.322)     | 26 (0.220)     | -12 (-19.33, -4.67)  | -31.58 (-46.36, -16.8)   |
| Dose Reduction for Antihyperglycemics | <30, <50, <60            | 40 (0.339)     | 34 (0.288)     | -6 (-10.8, -1.2)     | -15 (-25.44, -4.56)      |
| Dose Reduction for ARBs               | <45                      | 47 (0.398)     | 40 (0.339)     | -7 (-12.19, -1.81)   | -14.89 (-25.6, -4.19)    |
| Dose Reduction for Anticonvulsants    | <60                      | 22 (0.186)     | 17 (0.144)     | -5 (-9.38, -0.62)    | -22.73 (-43.14, -2.32)   |
| Dose Reduction for Beta-Blockers      | <50                      | 23 (0.195)     | 18 (0.152)     | -5 (-9.38, -0.62)    | -21.74 (-39.31, -4.16)   |
| Kidney Disease Education Covered      | 15-29                    | 24 (0.203)     | 22 (0.186)     | -2 (-6.8, 2.8)       | -8.33 (-27.24, 10.57)    |
| Nephrologist Referral                 | <30                      | 434 (3.674)    | 430 (3.640)    | -4 (-7.92, -0.08)    | -0.92 (-1.8, -0.04)      |
| Dose Reduction for Antibacterials     | <50                      | 7 (0.0593)     | 6 (0.0508)     | -1 (-2.96, 0.96)     | -14.29 (-40.21, 11.64)   |
| Eligible for Kidney Transplant        | <20                      | 39 (0.330)     | 32 (0.271)     | -7 (-12.19, -1.81)   | -17.95 (-29.5, -6.4)     |
| Dose Reduction for Anticoagulants     | <30                      | 4 (0.0339)     | 4 (0.0339)     | —                    | —                        |
| Dose Reduction for Diuretics          | <30                      | 12 (0.102)     | 7 (0.0593)     | -5 (-9.38, -0.62)    | -41.67 (-71.17, -12.16)  |
| Pre-emptive Arteriovenous Fistula     | <18                      | 31 (0.262)     | 28 (0.237)     | -3 (-6.39, 0.39)     | -9.68 (-20.52, 1.17)     |
| Dose Reduction for Statins            | <30                      | 3 (0.0254)     | 1 (0.00847)    | -2 (-4.77, 0.77)     | -66.67 (-120.01, -13.32) |

### I. Among Asian/Other Adults, from 2006 MDRD

| Implication                           | GFR Thresholds           | 2006 MDRD      | 2021 CKD-EPI   | Difference           | % Change                |
|---------------------------------------|--------------------------|----------------|----------------|----------------------|-------------------------|
|                                       | <i>ml/min/1.73 m.sq.</i> | <i>no. (%)</i> | <i>no. (%)</i> | <i>no. (95% CI)</i>  | <i>% (95% CI)</i>       |
| Chronic Kidney Disease Diagnosis      | <60                      | 595 (13.437)   | 532 (12.014)   | -63 (-79.51, -46.49) | -10.59 (-13.16, -8.02)  |
| Ineligible to Donate Kidney           | <60                      | 1,123 (25.361) | 1,086 (24.526) | -37 (-48.26, -25.74) | -3.3 (-4.26, -2.33)     |
| Dose Reduction for Any Drug           | <30, <45, <50, <60       | 83 (1.874)     | 61 (1.378)     | -22 (-31.99, -12.01) | -26.51 (-36.37, -16.64) |
| Medical Nutrition Therapy Covered     | 13-50                    | 60 (1.355)     | 44 (0.994)     | -16 (-24.32, -7.68)  | -26.67 (-38.06, -15.27) |
| Dose Reduction for ACE Inhibitors     | <50                      | 23 (0.519)     | 17 (0.384)     | -6 (-10.8, -1.2)     | -26.09 (-42.7, -9.48)   |
| Dose Reduction for Opioids            | <60                      | 21 (0.474)     | 16 (0.361)     | -5 (-9.38, -0.62)    | -23.81 (-42.56, -5.06)  |
| Dose Reduction for Antihyperglycemics | <30, <50, <60            | 15 (0.339)     | 9 (0.203)      | -6 (-11.54, -0.46)   | -40 (-68.15, -11.85)    |
| Dose Reduction for ARBs               | <45                      | 17 (0.384)     | 17 (0.384)     | —                    | —                       |
| Dose Reduction for Anticonvulsants    | <60                      | 11 (0.248)     | 8 (0.181)      | -3 (-6.39, 0.39)     | -27.27 (-54.47, -0.07)  |
| Dose Reduction for Beta-Blockers      | <50                      | 12 (0.271)     | 7 (0.158)      | -5 (-9.38, -0.62)    | -41.67 (-67.13, -16.2)  |
| Kidney Disease Education Covered      | 15-29                    | 9 (0.203)      | 6 (0.136)      | -3 (-6.39, 0.39)     | -33.33 (-67.38, 0.72)   |
| Nephrologist Referral                 | <30                      | 130 (2.936)    | 127 (2.868)    | -3 (-6.39, 0.39)     | -2.31 (-4.86, 0.25)     |
| Dose Reduction for Antibacterials     | <50                      | 0 (0.000)      | 0 (0.000)      | —                    | —                       |
| Eligible for Kidney Transplant        | <20                      | 13 (0.294)     | 11 (0.248)     | -2 (-4.77, 0.77)     | -15.38 (-35.27, 4.5)    |
| Dose Reduction for Anticoagulants     | <30                      | 2 (0.0452)     | 1 (0.0226)     | -1 (-2.96, 0.96)     | -50 (-119.3, 19.3)      |
| Dose Reduction for Diuretics          | <30                      | 4 (0.0903)     | 3 (0.0678)     | -1 (-2.96, 0.96)     | -25 (-67.43, 17.43)     |
| Pre-emptive Arteriovenous Fistula     | <18                      | 11 (0.248)     | 10 (0.226)     | -1 (-2.96, 0.96)     | -9.09 (-26.23, 8.05)    |
| Dose Reduction for Statins            | <30                      | 3 (0.0678)     | 3 (0.0678)     | —                    | —                       |

### J. Among Asian/Other Adults, from 2009 CKD-EPI

| Implication                           | GFR Thresholds           | 2009 CKD-EPI   | 2021 CKD-EPI   | Difference           | % Change                |
|---------------------------------------|--------------------------|----------------|----------------|----------------------|-------------------------|
|                                       | <i>ml/min/1.73 m.sq.</i> | <i>no. (%)</i> | <i>no. (%)</i> | <i>no. (95% CI)</i>  | <i>% (95% CI)</i>       |
| Chronic Kidney Disease Diagnosis      | <60                      | 565 (12.760)   | 532 (12.014)   | -33 (-43.18, -22.82) | -5.84 (-7.54, -4.14)    |
| Ineligible to Donate Kidney           | <60                      | 1,102 (24.887) | 1,086 (24.526) | -16 (-23.33, -8.67)  | -1.45 (-2.11, -0.8)     |
| Dose Reduction for Any Drug           | <30, <45, <50, <60       | 76 (1.716)     | 61 (1.378)     | -15 (-23.08, -6.92)  | -19.74 (-29.32, -10.16) |
| Medical Nutrition Therapy Covered     | 13-50                    | 59 (1.332)     | 44 (0.994)     | -15 (-23.08, -6.92)  | -25.42 (-36.59, -14.26) |
| Dose Reduction for ACE Inhibitors     | <50                      | 22 (0.497)     | 17 (0.384)     | -5 (-9.38, -0.62)    | -22.73 (-38.82, -6.63)  |
| Dose Reduction for Opioids            | <60                      | 17 (0.384)     | 16 (0.361)     | -1 (-2.96, 0.96)     | -5.88 (-17.15, 5.38)    |
| Dose Reduction for Antihyperglycemics | <30, <50, <60            | 14 (0.316)     | 9 (0.203)      | -5 (-10.19, 0.19)    | -35.71 (-64.73, -6.7)   |
| Dose Reduction for ARBs               | <45                      | 17 (0.384)     | 17 (0.384)     | —                    | —                       |
| Dose Reduction for Anticonvulsants    | <60                      | 10 (0.226)     | 8 (0.181)      | -2 (-4.77, 0.77)     | -20 (-45.4, 5.4)        |
| Dose Reduction for Beta-Blockers      | <50                      | 10 (0.226)     | 7 (0.158)      | -3 (-6.39, 0.39)     | -30 (-55.4, -4.6)       |
| Kidney Disease Education Covered      | 15-29                    | 11 (0.248)     | 6 (0.136)      | -5 (-9.38, -0.62)    | -45.45 (-77.44, -13.47) |
| Nephrologist Referral                 | <30                      | 132 (2.981)    | 127 (2.868)    | -5 (-9.38, -0.62)    | -3.79 (-6.97, -0.6)     |
| Dose Reduction for Antibacterials     | <50                      | 0 (0.000)      | 0 (0.000)      | —                    | —                       |
| Eligible for Kidney Transplant        | <20                      | 13 (0.294)     | 11 (0.248)     | -2 (-4.77, 0.77)     | -15.38 (-35.27, 4.5)    |
| Dose Reduction for Anticoagulants     | <30                      | 2 (0.0452)     | 1 (0.0226)     | -1 (-2.96, 0.96)     | -50 (-119.3, 19.3)      |
| Dose Reduction for Diuretics          | <30                      | 4 (0.0903)     | 3 (0.0678)     | -1 (-2.96, 0.96)     | -25 (-67.43, 17.43)     |
| Pre-emptive Arteriovenous Fistula     | <18                      | 11 (0.248)     | 10 (0.226)     | -1 (-2.96, 0.96)     | -9.09 (-26.23, 8.05)    |
| Dose Reduction for Statins            | <30                      | 3 (0.0678)     | 3 (0.0678)     | —                    | —                       |

**A.** Changes to GFR-dependent clinical decisions for Black adults in NHANES 2001-2018 when switching from the 2006 MDRD equation to the 2021 CKD-EPI equation. Estimates are not survey-weighted. Clinical recommendations are primarily from the 2012 KDIGO Clinical Practice Guidelines, with some exceptions. Pre-emptive arteriovenous fistula practices and SGLT2 inhibitor guidelines were derived from the literature (see methods) and medical nutritional therapy and kidney disease education coverage were derived from the Medicare Part B Benefit Policy.

**B.** Same as table S-3A, but modeling a change from the 2009 CKD-EPI equation to the 2021 CKD-EPI equation.

**C-D.** Same as table S-3A and S-3B, but among Non-Black Adults.

**E-F.** Same as table S-3A and S-3B, but among White Adults.

**G-H.** Same as table S-3A and S-3B, but among Hispanic Adults.

**I-J.** Same as table S-3A and S-3B, but among Asian/Other Adults.

Abbreviations: ACE: angiotensin-converting enzyme; ARB: angiotensin receptor blocker; CKD: chronic kidney disease; CKD-EPI: CKD Epidemiology Collaboration; eGFR: estimated glomerular filtration rate; KDIGO: Kidney Disease Improving Global Outcomes; MDRD: Modification of Diet in Renal Disease; NHANES: National Health and Nutrition Examination Survey.



**Table S-4: Survey adjusted national projections of changes to GFR-dependent clinical decisions in the US, 2001-2018**

**A. Among Black Adults, from 2006 MDRD**

| Implication                           | GFR Thresholds           | 2006 MDRD           | 2021 CKD-EPI        | Difference                 | % Change             |
|---------------------------------------|--------------------------|---------------------|---------------------|----------------------------|----------------------|
|                                       | <i>ml/min/1.73 m.sq.</i> | <i>no. (%)</i>      | <i>no. (%)</i>      | <i>no. (95% CI)</i>        | <i>% (95% CI)</i>    |
| Chronic Kidney Disease Diagnosis      | <60                      | 3,978,760 (14.956)  | 4,412,284 (16.585)  | 433,524 (350,081, 516,966) | 10.9 (9.07, 12.72)   |
| Ineligible to Donate Kidney           | <60                      | 10,266,439 (38.591) | 10,512,583 (39.516) | 246,144 (189,465, 302,823) | 2.4 (1.92, 2.88)     |
| Dose Reduction for Any Drug           | <30, <45, <50, <60       | 583,209 (2.192)     | 805,545 (3.028)     | 222,336 (169,319, 275,352) | 38.12 (28.58, 47.67) |
| Medical Nutrition Therapy Covered     | 13-50                    | 378,775 (1.424)     | 562,428 (2.114)     | 183,653 (144,724, 222,582) | 48.49 (36.08, 60.9)  |
| Dose Reduction for ACE Inhibitors     | <50                      | 200,464 (0.754)     | 285,835 (1.074)     | 85,371 (57,999, 112,743)   | 42.59 (27.3, 57.87)  |
| Dose Reduction for Opioids            | <60                      | 145,322 (0.546)     | 206,534 (0.776)     | 61,211 (36,722, 85,701)    | 42.12 (24.17, 60.07) |
| Dose Reduction for Antihyperglycemics | <30, <50, <60            | 99,887 (0.375)      | 126,787 (0.477)     | 26,900 (12,146, 41,653)    | 26.93 (9.44, 44.42)  |
| Dose Reduction for ARBs               | <45                      | 132,055 (0.496)     | 178,438 (0.671)     | 46,383 (26,520, 66,245)    | 35.12 (18.25, 52)    |
| Dose Reduction for Anticonvulsants    | <60                      | 78,605 (0.295)      | 95,405 (0.359)      | 16,800 (7,092, 26,507)     | 21.37 (9, 33.74)     |
| Dose Reduction for Beta-Blockers      | <50                      | 59,959 (0.225)      | 76,136 (0.286)      | 16,176 (2,943, 29,410)     | 26.98 (2.29, 51.66)  |
| Kidney Disease Education Covered      | 15-29                    | 49,089 (0.185)      | 71,303 (0.268)      | 22,213 (2,915, 41,511)     | 45.25 (-3.37, 93.87) |
| Nephrologist Referral                 | <30                      | 847,831 (3.187)     | 889,600 (3.344)     | 41,769 (19,787, 63,750)    | 4.93 (2.29, 7.57)    |
| Dose Reduction for Antibacterials     | <50                      | 29,689 (0.112)      | 31,631 (0.119)      | 1,941 (-749.98, 4,632)     | 6.54 (-3.31, 16.39)  |
| Eligible for Kidney Transplant        | <20                      | 168,834 (0.635)     | 184,643 (0.694)     | 15,809 (3,777, 27,840)     | 9.36 (2.16, 16.57)   |
| Dose Reduction for Anticoagulants     | <30                      | 17,004 (0.0639)     | 21,266 (0.0799)     | 4,263 (-585.34, 9,111)     | 25.07 (-9.23, 59.37) |
| Dose Reduction for Diuretics          | <30                      | 57,324 (0.215)      | 68,341 (0.257)      | 11,017 (1,139, 20,895)     | 19.22 (-1.64, 40.07) |
| Pre-emptive Arteriovenous Fistula     | <18                      | 157,547 (0.592)     | 174,754 (0.657)     | 17,207 (4,103, 30,312)     | 10.92 (2.72, 19.12)  |
| Dose Reduction for Statins            | <30                      | 38,393 (0.144)      | 45,464 (0.171)      | 7,071 (-1,029, 15,171)     | 18.42 (-5.38, 42.21) |

**B. Among Black Adults, from 2009 CKD-EPI**

| Implication                           | GFR Thresholds           | 2009 CKD-EPI        | 2021 CKD-EPI        | Difference                 | % Change              |
|---------------------------------------|--------------------------|---------------------|---------------------|----------------------------|-----------------------|
|                                       | <i>ml/min/1.73 m.sq.</i> | <i>no. (%)</i>      | <i>no. (%)</i>      | <i>no. (95% CI)</i>        | <i>% (95% CI)</i>     |
| Chronic Kidney Disease Diagnosis      | <60                      | 3,981,873 (14.968)  | 4,412,284 (16.585)  | 430,411 (347,102, 513,719) | 10.81 (8.86, 12.76)   |
| Ineligible to Donate Kidney           | <60                      | 10,245,910 (38.514) | 10,512,583 (39.516) | 266,673 (208,949, 324,396) | 2.6 (2.09, 3.12)      |
| Dose Reduction for Any Drug           | <30, <45, <50, <60       | 622,201 (2.339)     | 805,545 (3.028)     | 183,344 (130,793, 235,895) | 29.47 (20.58, 38.35)  |
| Medical Nutrition Therapy Covered     | 13-50                    | 451,811 (1.698)     | 562,428 (2.114)     | 110,617 (81,208, 140,026)  | 24.48 (17.29, 31.68)  |
| Dose Reduction for ACE Inhibitors     | <50                      | 233,614 (0.878)     | 285,835 (1.074)     | 52,221 (29,403, 75,039)    | 22.35 (12.36, 32.35)  |
| Dose Reduction for Opioids            | <60                      | 145,749 (0.548)     | 206,534 (0.776)     | 60,785 (35,803, 85,766)    | 41.7 (23.08, 60.33)   |
| Dose Reduction for Antihyperglycemics | <30, <50, <60            | 100,198 (0.377)     | 126,787 (0.477)     | 26,589 (10,408, 42,769)    | 26.54 (8.62, 44.45)   |
| Dose Reduction for ARBs               | <45                      | 135,275 (0.508)     | 178,438 (0.671)     | 43,163 (22,759, 63,567)    | 31.91 (15.31, 48.5)   |
| Dose Reduction for Anticonvulsants    | <60                      | 77,859 (0.293)      | 95,405 (0.359)      | 17,546 (5,561, 29,530)     | 22.54 (6.37, 38.7)    |
| Dose Reduction for Beta-Blockers      | <50                      | 67,806 (0.255)      | 76,136 (0.286)      | 8,329 (-1,475, 18,134)     | 12.28 (-3.14, 27.7)   |
| Kidney Disease Education Covered      | 15-29                    | 62,676 (0.236)      | 71,303 (0.268)      | 8,627 (-6,039, 23,292)     | 13.76 (-11.3, 38.83)  |
| Nephrologist Referral                 | <30                      | 861,644 (3.239)     | 889,600 (3.344)     | 27,955 (8,387, 47,524)     | 3.24 (0.97, 5.52)     |
| Dose Reduction for Antibacterials     | <50                      | 26,232 (0.0986)     | 31,631 (0.119)      | 5,399 (-3,450, 14,247)     | 20.58 (-15.23, 56.39) |
| Eligible for Kidney Transplant        | <20                      | 178,958 (0.673)     | 184,643 (0.694)     | 5,685 (32.25, 11,338)      | 3.18 (-0.06, 6.41)    |
| Dose Reduction for Anticoagulants     | <30                      | 19,848 (0.0746)     | 21,266 (0.0799)     | 1,418 (-1,361, 4,198)      | 7.15 (-7.68, 21.97)   |
| Dose Reduction for Diuretics          | <30                      | 53,866 (0.202)      | 68,341 (0.257)      | 14,474 (1,489, 27,460)     | 26.87 (-1.61, 55.35)  |
| Pre-emptive Arteriovenous Fistula     | <18                      | 153,914 (0.579)     | 174,754 (0.657)     | 20,841 (4,964, 36,717)     | 13.54 (2.86, 24.22)   |
| Dose Reduction for Statins            | <30                      | 42,595 (0.160)      | 45,464 (0.171)      | 2,869 (-2,754, 8,491)      | 6.74 (-6.89, 20.36)   |

### C. Among Non-Black Adults, from 2006 MDRD

| Implication                           | GFR Thresholds           | 2006 MDRD           | 2021 CKD-EPI        | Difference                          | % Change                |
|---------------------------------------|--------------------------|---------------------|---------------------|-------------------------------------|-------------------------|
|                                       | <i>ml/min/1.73 m.sq.</i> | <i>no. (%)</i>      | <i>no. (%)</i>      | <i>no. (95% CI)</i>                 | <i>% (95% CI)</i>       |
| Chronic Kidney Disease Diagnosis      | <60                      | 27,949,202 (13.734) | 22,437,308 (11.025) | -5,511,894 (-6,162,844, -4,860,944) | -19.72 (-21.43, -18.01) |
| Ineligible to Donate Kidney           | <60                      | 58,625,709 (28.808) | 54,662,362 (26.860) | -3,963,346 (-4,463,108, -3,463,585) | -6.76 (-7.49, -6.03)    |
| Dose Reduction for Any Drug           | <30, <45, <50, <60       | 4,332,079 (2.129)   | 2,858,398 (1.405)   | -1,473,681 (-1,732,091, -1,215,272) | -34.02 (-38, -30.04)    |
| Medical Nutrition Therapy Covered     | 13-50                    | 3,546,479 (1.743)   | 2,504,419 (1.231)   | -1,042,060 (-1,233,338, -850,782)   | -29.38 (-33.57, -25.2)  |
| Dose Reduction for ACE Inhibitors     | <50                      | 1,377,923 (0.677)   | 922,634 (0.453)     | -455,290 (-575,309, -335,271)       | -33.04 (-39.93, -26.15) |
| Dose Reduction for Opioids            | <60                      | 1,311,931 (0.645)   | 834,313 (0.410)     | -477,618 (-638,627, -316,609)       | -36.41 (-44.74, -28.07) |
| Dose Reduction for Antihyperglycemics | <30, <50, <60            | 637,435 (0.313)     | 405,277 (0.199)     | -232,158 (-320,261, -144,055)       | -36.42 (-47.07, -25.77) |
| Dose Reduction for ARBs               | <45                      | 653,010 (0.321)     | 468,619 (0.230)     | -184,391 (-271,746, -97,036)        | -28.24 (-39.41, -17.06) |
| Dose Reduction for Anticonvulsants    | <60                      | 646,848 (0.318)     | 429,009 (0.211)     | -217,840 (-298,866, -136,813)       | -33.68 (-43.71, -23.64) |
| Dose Reduction for Beta-Blockers      | <50                      | 618,751 (0.304)     | 414,164 (0.204)     | -204,587 (-280,010, -129,164)       | -33.06 (-42.36, -23.77) |
| Kidney Disease Education Covered      | 15-29                    | 343,412 (0.169)     | 256,453 (0.126)     | -86,959 (-130,918, -43,000)         | -25.32 (-35.35, -15.3)  |
| Nephrologist Referral                 | <30                      | 5,723,236 (2.812)   | 5,647,440 (2.775)   | -75,796 (-116,186, -35,406)         | -1.32 (-2.04, -0.61)    |
| Dose Reduction for Antibacterials     | <50                      | 144,698 (0.0711)    | 91,312 (0.0449)     | -53,386 (-99,698, -7,074)           | -36.9 (-58.76, -15.03)  |
| Eligible for Kidney Transplant        | <20                      | 306,779 (0.151)     | 281,821 (0.138)     | -24,958 (-43,745, -6,172)           | -8.14 (-14.28, -2)      |
| Dose Reduction for Anticoagulants     | <30                      | 91,461 (0.0449)     | 73,841 (0.0363)     | -17,620 (-40,126, 4,886)            | -19.26 (-41.16, 2.63)   |
| Dose Reduction for Diuretics          | <30                      | 244,040 (0.120)     | 212,990 (0.105)     | -31,051 (-55,664, -6,437)           | -12.72 (-21.69, -3.76)  |
| Pre-emptive Arteriovenous Fistula     | <18                      | 255,049 (0.125)     | 238,858 (0.117)     | -16,190 (-34,642, 2,262)            | -6.35 (-13.59, 0.89)    |
| Dose Reduction for Statins            | <30                      | 43,365 (0.0213)     | 38,028 (0.0187)     | -5,337 (-12,293, 1,618)             | -12.31 (-28.15, 3.54)   |

### D. Among Non-Black Adults, from 2009 CKD-EPI

| Implication                           | GFR Thresholds           | 2009 CKD-EPI        | 2021 CKD-EPI        | Difference                          | % Change                |
|---------------------------------------|--------------------------|---------------------|---------------------|-------------------------------------|-------------------------|
|                                       | <i>ml/min/1.73 m.sq.</i> | <i>no. (%)</i>      | <i>no. (%)</i>      | <i>no. (95% CI)</i>                 | <i>% (95% CI)</i>       |
| Chronic Kidney Disease Diagnosis      | <60                      | 25,008,079 (12.289) | 22,437,308 (11.025) | -2,570,771 (-2,908,041, -2,233,501) | -10.28 (-11.42, -9.14)  |
| Ineligible to Donate Kidney           | <60                      | 56,509,496 (27.768) | 54,662,362 (26.860) | -1,847,134 (-2,126,912, -1,567,356) | -3.27 (-3.71, -2.82)    |
| Dose Reduction for Any Drug           | <30, <45, <50, <60       | 3,791,902 (1.863)   | 2,858,398 (1.405)   | -933,505 (-1,110,733, -756,277)     | -24.62 (-28.19, -21.04) |
| Medical Nutrition Therapy Covered     | 13-50                    | 3,465,596 (1.703)   | 2,504,419 (1.231)   | -961,177 (-1,137,305, -785,049)     | -27.74 (-31.87, -23.6)  |
| Dose Reduction for ACE Inhibitors     | <50                      | 1,262,101 (0.620)   | 922,634 (0.453)     | -339,468 (-437,484, -241,451)       | -26.9 (-33.32, -20.47)  |
| Dose Reduction for Opioids            | <60                      | 1,008,932 (0.496)   | 834,313 (0.410)     | -174,620 (-265,764, -83,475)        | -17.31 (-25.06, -9.56)  |
| Dose Reduction for Antihyperglycemics | <30, <50, <60            | 564,292 (0.277)     | 405,277 (0.199)     | -159,015 (-230,969, -87,060)        | -28.18 (-38.83, -17.53) |
| Dose Reduction for ARBs               | <45                      | 653,412 (0.321)     | 468,619 (0.230)     | -184,793 (-269,737, -99,848)        | -28.28 (-39.05, -17.51) |
| Dose Reduction for Anticonvulsants    | <60                      | 524,986 (0.258)     | 429,009 (0.211)     | -95,977 (-146,207, -45,746)         | -18.28 (-27.26, -9.3)   |
| Dose Reduction for Beta-Blockers      | <50                      | 548,487 (0.270)     | 414,164 (0.204)     | -134,323 (-184,357, -84,289)        | -24.49 (-32.29, -16.69) |
| Kidney Disease Education Covered      | 15-29                    | 361,517 (0.178)     | 256,453 (0.126)     | -105,064 (-156,851, -53,276)        | -29.06 (-40.3, -17.82)  |
| Nephrologist Referral                 | <30                      | 5,761,052 (2.831)   | 5,647,440 (2.775)   | -113,612 (-164,218, -63,006)        | -1.97 (-2.85, -1.09)    |
| Dose Reduction for Antibacterials     | <50                      | 120,737 (0.0593)    | 91,312 (0.0449)     | -29,425 (-61,471, 2,620)            | -24.37 (-44.85, -3.9)   |
| Eligible for Kidney Transplant        | <20                      | 323,987 (0.159)     | 281,821 (0.138)     | -42,166 (-72,010, -12,323)          | -13.02 (-21.4, -4.63)   |
| Dose Reduction for Anticoagulants     | <30                      | 90,183 (0.0443)     | 73,841 (0.0363)     | -16,342 (-33,138, 454.57)           | -18.12 (-35.77, -0.48)  |
| Dose Reduction for Diuretics          | <30                      | 245,442 (0.121)     | 212,990 (0.105)     | -32,452 (-57,218, -7,686)           | -13.22 (-22.17, -4.27)  |
| Pre-emptive Arteriovenous Fistula     | <18                      | 270,676 (0.133)     | 238,858 (0.117)     | -31,818 (-62,612, -1,024)           | -11.76 (-22.52, -0.98)  |
| Dose Reduction for Statins            | <30                      | 47,876 (0.0235)     | 38,028 (0.0187)     | -9,848 (-21,097, 1,401)             | -20.57 (-42.26, 1.12)   |

### E. Among White Adults, from 2006 MDRD

| Implication                           | GFR Thresholds           | 2006 MDRD           | 2021 CKD-EPI        | Difference                          | % Change                |
|---------------------------------------|--------------------------|---------------------|---------------------|-------------------------------------|-------------------------|
|                                       | <i>ml/min/1.73 m.sq.</i> | <i>no. (%)</i>      | <i>no. (%)</i>      | <i>no. (95% CI)</i>                 | <i>% (95% CI)</i>       |
| Chronic Kidney Disease Diagnosis      | <60                      | 21,943,431 (14.211) | 16,966,772 (10.988) | -4,976,659 (-5,628,182, -4,325,135) | -22.68 (-24.75, -20.61) |
| Ineligible to Donate Kidney           | <60                      | 45,642,691 (29.558) | 42,031,764 (27.220) | -3,610,926 (-4,103,847, -3,118,006) | -7.91 (-8.82, -7)       |
| Dose Reduction for Any Drug           | <30, <45, <50, <60       | 3,729,148 (2.415)   | 2,442,103 (1.582)   | -1,287,044 (-1,535,738, -1,038,351) | -34.51 (-38.97, -30.06) |
| Medical Nutrition Therapy Covered     | 13-50                    | 3,125,043 (2.024)   | 2,198,326 (1.424)   | -926,718 (-1,107,738, -745,698)     | -29.66 (-34.19, -25.12) |
| Dose Reduction for ACE Inhibitors     | <50                      | 1,189,179 (0.770)   | 802,271 (0.520)     | -386,908 (-500,362, -273,453)       | -32.54 (-40.06, -25.02) |
| Dose Reduction for Opioids            | <60                      | 1,154,756 (0.748)   | 732,623 (0.474)     | -422,133 (-583,751, -260,515)       | -36.56 (-46.04, -27.08) |
| Dose Reduction for Antihyperglycemics | <30, <50, <60            | 528,751 (0.342)     | 341,151 (0.221)     | -187,600 (-271,654, -103,546)       | -35.48 (-47.7, -23.26)  |
| Dose Reduction for ARBs               | <45                      | 518,147 (0.336)     | 342,267 (0.222)     | -175,880 (-262,369, -89,392)        | -33.94 (-46.58, -21.31) |
| Dose Reduction for Anticonvulsants    | <60                      | 548,952 (0.356)     | 368,412 (0.239)     | -180,540 (-258,331, -102,749)       | -32.89 (-44.1, -21.67)  |
| Dose Reduction for Beta-Blockers      | <50                      | 547,694 (0.355)     | 359,447 (0.233)     | -188,248 (-262,933, -113,563)       | -34.37 (-44.52, -24.22) |
| Kidney Disease Education Covered      | 15-29                    | 271,561 (0.176)     | 205,671 (0.133)     | -65,889 (-103,411, -28,368)         | -24.26 (-34.78, -13.75) |
| Nephrologist Referral                 | <30                      | 4,341,853 (2.812)   | 4,284,312 (2.775)   | -57,541 (-95,586, -19,495)          | -1.32 (-2.21, -0.44)    |
| Dose Reduction for Antibacterials     | <50                      | 132,562 (0.0858)    | 80,396 (0.0521)     | -52,166 (-98,417, -5,916)           | -39.35 (-62.59, -16.11) |
| Eligible for Kidney Transplant        | <20                      | 204,836 (0.133)     | 197,959 (0.128)     | -6,877 (-20,356, 6,602)             | -3.36 (-9.84, 3.13)     |
| Dose Reduction for Anticoagulants     | <30                      | 77,417 (0.0501)     | 64,950 (0.0421)     | -12,466 (-32,579, 7,646)            | -16.1 (-39.76, 7.55)    |
| Dose Reduction for Diuretics          | <30                      | 206,854 (0.134)     | 182,978 (0.118)     | -23,876 (-47,609, -142,36)          | -11.54 (-21.37, -1.72)  |
| Pre-emptive Arteriovenous Fistula     | <18                      | 171,187 (0.111)     | 166,470 (0.108)     | -4,717 (-13,962, 4,528)             | -2.76 (-8.13, 2.62)     |
| Dose Reduction for Statins            | <30                      | 30,772 (0.0199)     | 27,556 (0.0178)     | -3,216 (-9,518, 3,087)              | -10.45 (-30.43, 9.53)   |

### F. Among White Adults, from 2009 CKD-EPI

| Implication                           | GFR Thresholds           | 2009 CKD-EPI        | 2021 CKD-EPI        | Difference                          | % Change                |
|---------------------------------------|--------------------------|---------------------|---------------------|-------------------------------------|-------------------------|
|                                       | <i>ml/min/1.73 m.sq.</i> | <i>no. (%)</i>      | <i>no. (%)</i>      | <i>no. (95% CI)</i>                 | <i>% (95% CI)</i>       |
| Chronic Kidney Disease Diagnosis      | <60                      | 19,310,532 (12.505) | 16,966,772 (10.988) | -2,343,760 (-2,684,022, -2,003,498) | -12.14 (-13.56, -10.72) |
| Ineligible to Donate Kidney           | <60                      | 43,746,908 (28.330) | 42,031,764 (27.220) | -1,715,143 (-1,995,162, -1,435,125) | -3.92 (-4.47, -3.37)    |
| Dose Reduction for Any Drug           | <30, <45, <50, <60       | 3,249,163 (2.104)   | 2,442,103 (1.582)   | -807,060 (-978,331, -635,788)       | -24.84 (-28.91, -20.77) |
| Medical Nutrition Therapy Covered     | 13-50                    | 3,051,063 (1.976)   | 2,198,326 (1.424)   | -852,737 (-1,017,974, -687,500)     | -27.95 (-32.36, -23.54) |
| Dose Reduction for ACE Inhibitors     | <50                      | 1,081,434 (0.700)   | 802,271 (0.520)     | -279,162 (-370,253, -188,071)       | -25.81 (-32.81, -18.82) |
| Dose Reduction for Opioids            | <60                      | 884,995 (0.573)     | 732,623 (0.474)     | -152,373 (-242,838, -61,907)        | -17.22 (-26.03, -8.41)  |
| Dose Reduction for Antihyperglycemics | <30, <50, <60            | 469,355 (0.304)     | 341,151 (0.221)     | -128,204 (-195,464, -60,944)        | -27.32 (-39.2, -15.43)  |
| Dose Reduction for ARBs               | <45                      | 517,506 (0.335)     | 342,267 (0.222)     | -175,240 (-259,299, -91,181)        | -33.86 (-46.28, -21.45) |
| Dose Reduction for Anticonvulsants    | <60                      | 449,365 (0.291)     | 368,412 (0.239)     | -80,953 (-129,099, -32,807)         | -18.02 (-27.91, -8.12)  |
| Dose Reduction for Beta-Blockers      | <50                      | 484,827 (0.314)     | 359,447 (0.233)     | -125,380 (-175,180, -75,580)        | -25.86 (-34.54, -17.18) |
| Kidney Disease Education Covered      | 15-29                    | 282,804 (0.183)     | 205,671 (0.133)     | -77,133 (-121,252, -33,015)         | -27.27 (-39.52, -15.03) |
| Nephrologist Referral                 | <30                      | 4,375,862 (2.834)   | 4,284,312 (2.775)   | -91,550 (-139,394, -43,706)         | -2.09 (-3.2, -0.98)     |
| Dose Reduction for Antibacterials     | <50                      | 108,602 (0.0703)    | 80,396 (0.0521)     | -28,205 (-60,161, 3,751)            | -25.97 (-48.29, -3.66)  |
| Eligible for Kidney Transplant        | <20                      | 227,137 (0.147)     | 197,959 (0.128)     | -29,178 (-57,163, -1,193)           | -12.85 (-23.95, -1.74)  |
| Dose Reduction for Anticoagulants     | <30                      | 76,139 (0.0493)     | 64,950 (0.0421)     | -11,188 (-24,609, 2,232)            | -14.7 (-32.06, 2.67)    |
| Dose Reduction for Diuretics          | <30                      | 208,255 (0.135)     | 182,978 (0.118)     | -25,277 (-49,169, -1,385)           | -12.14 (-21.92, -2.36)  |
| Pre-emptive Arteriovenous Fistula     | <18                      | 193,711 (0.125)     | 166,470 (0.108)     | -27,241 (-58,151, 3,668)            | -14.06 (-28.97, 0.84)   |
| Dose Reduction for Statins            | <30                      | 35,283 (0.0228)     | 27,556 (0.0178)     | -7,727 (-18,584, 3,131)             | -21.9 (-49.95, 6.16)    |

### G. Among Hispanic Adults, from 2006 MDRD

| Implication                           | GFR Thresholds           | 2006 MDRD          | 2021 CKD-EPI       | Difference                    | % Change                |
|---------------------------------------|--------------------------|--------------------|--------------------|-------------------------------|-------------------------|
|                                       | <i>ml/min/1.73 m.sq.</i> | <i>no. (%)</i>     | <i>no. (%)</i>     | <i>no. (95% CI)</i>           | <i>% (95% CI)</i>       |
| Chronic Kidney Disease Diagnosis      | <60                      | 3,914,988 (12.008) | 3,590,288 (11.012) | -324,700 (-404,793, -244,607) | -8.29 (-10.01, -6.58)   |
| Ineligible to Donate Kidney           | <60                      | 8,909,910 (27.327) | 8,676,915 (26.613) | -232,995 (-301,505, -164,486) | -2.62 (-3.32, -1.91)    |
| Dose Reduction for Any Drug           | <30, <45, <50, <60       | 345,421 (1.059)    | 233,827 (0.717)    | -111,594 (-149,682, -73,507)  | -32.31 (-40.75, -23.86) |
| Medical Nutrition Therapy Covered     | 13-50                    | 204,242 (0.626)    | 155,788 (0.478)    | -48,454 (-70,174, -26,733)    | -23.72 (-31.52, -15.92) |
| Dose Reduction for ACE Inhibitors     | <50                      | 112,967 (0.346)    | 74,045 (0.227)     | -38,922 (-57,336, -20,508)    | -34.45 (-46.22, -22.69) |
| Dose Reduction for Opioids            | <60                      | 79,842 (0.245)     | 46,017 (0.141)     | -33,826 (-53,550, -14,102)    | -42.37 (-58.85, -25.88) |
| Dose Reduction for Antihyperglycemics | <30, <50, <60            | 66,329 (0.203)     | 38,652 (0.119)     | -27,677 (-50,321, -5,033)     | -41.73 (-63.05, -20.4)  |
| Dose Reduction for ARBs               | <45                      | 78,739 (0.241)     | 70,229 (0.215)     | -8,510 (-15,184, -1,836)      | -10.81 (-19.36, -2.26)  |
| Dose Reduction for Anticonvulsants    | <60                      | 62,858 (0.193)     | 35,686 (0.109)     | -27,172 (-45,944, -8,400)     | -43.23 (-67.96, -18.5)  |
| Dose Reduction for Beta-Blockers      | <50                      | 40,917 (0.125)     | 35,867 (0.110)     | -5,050 (-10,133, 33.67)       | -12.34 (-24.68, 0)      |
| Kidney Disease Education Covered      | 15-29                    | 36,133 (0.111)     | 30,631 (0.0939)    | -5,502 (-15,142, 4,139)       | -15.23 (-38.88, 8.43)   |
| Nephrologist Referral                 | <30                      | 932,179 (2.859)    | 928,560 (2.848)    | -3,619 (-7,843, 603.87)       | -0.39 (-0.82, 0.05)     |
| Dose Reduction for Antibacterials     | <50                      | 12,136 (0.0372)    | 10,916 (0.0335)    | -1,220 (-3,611, 1,171)        | -10.05 (-29.53, 9.42)   |
| Eligible for Kidney Transplant        | <20                      | 68,932 (0.211)     | 54,926 (0.168)     | -14,006 (-25,777, -2,234)     | -20.32 (-36.01, -4.62)  |
| Dose Reduction for Anticoagulants     | <30                      | 6,774 (0.0208)     | 6,774 (0.0208)     | —                             | —                       |
| Dose Reduction for Diuretics          | <30                      | 16,395 (0.0503)    | 11,453 (0.0351)    | -4,942 (-9,780, -104.81)      | -30.14 (-58.23, -2.06)  |
| Pre-emptive Arteriovenous Fistula     | <18                      | 54,926 (0.168)     | 44,851 (0.138)     | -10,075 (-26,695, 6,544)      | -18.34 (-46.67, 9.98)   |
| Dose Reduction for Statins            | <30                      | 5,997 (0.0184)     | 3,875 (0.0119)     | -2,122 (-5,063, 820.01)       | -35.38 (-90.27, 19.51)  |

### H. Among Hispanic Adults, from 2009 CKD-EPI

| Implication                           | GFR Thresholds           | 2009 CKD-EPI       | 2021 CKD-EPI       | Difference                   | % Change                |
|---------------------------------------|--------------------------|--------------------|--------------------|------------------------------|-------------------------|
|                                       | <i>ml/min/1.73 m.sq.</i> | <i>no. (%)</i>     | <i>no. (%)</i>     | <i>no. (95% CI)</i>          | <i>% (95% CI)</i>       |
| Chronic Kidney Disease Diagnosis      | <60                      | 3,712,131 (11.385) | 3,590,288 (11.012) | -121,843 (-164,223, -79,463) | -3.28 (-4.28, -2.28)    |
| Ineligible to Donate Kidney           | <60                      | 8,758,023 (26.861) | 8,676,915 (26.613) | -81,108 (-111,562, -50,654)  | -0.93 (-1.24, -0.61)    |
| Dose Reduction for Any Drug           | <30, <45, <50, <60       | 311,045 (0.954)    | 233,827 (0.717)    | -77,218 (-108,367, -46,069)  | -24.82 (-32.95, -16.7)  |
| Medical Nutrition Therapy Covered     | 13-50                    | 205,948 (0.632)    | 155,788 (0.478)    | -50,160 (-72,805, -27,514)   | -24.36 (-32.47, -16.24) |
| Dose Reduction for ACE Inhibitors     | <50                      | 107,773 (0.331)    | 74,045 (0.227)     | -33,727 (-50,246, -17,208)   | -31.3 (-42.91, -19.68)  |
| Dose Reduction for Opioids            | <60                      | 63,510 (0.195)     | 46,017 (0.141)     | -17,493 (-28,603, -6,383)    | -27.54 (-41.19, -13.9)  |
| Dose Reduction for Antihyperglycemics | <30, <50, <60            | 54,791 (0.168)     | 38,652 (0.119)     | -16,139 (-36,999, 4,722)     | -29.45 (-57.08, -1.83)  |
| Dose Reduction for ARBs               | <45                      | 79,782 (0.245)     | 70,229 (0.215)     | -9,553 (-16,906, -2,200)     | -11.97 (-21.2, -2.75)   |
| Dose Reduction for Anticonvulsants    | <60                      | 43,642 (0.134)     | 35,686 (0.109)     | -7,956 (-15,601, -309.95)    | -18.23 (-37.09, 0.63)   |
| Dose Reduction for Beta-Blockers      | <50                      | 39,419 (0.121)     | 35,867 (0.110)     | -3,551 (-6,884, -218.56)     | -9.01 (-17.91, -0.11)   |
| Kidney Disease Education Covered      | 15-29                    | 33,751 (0.104)     | 30,631 (0.0939)    | -3,120 (-14,850, 8,610)      | -9.24 (-42.08, 23.59)   |
| Nephrologist Referral                 | <30                      | 933,558 (2.863)    | 928,560 (2.848)    | -4,998 (-10,011, 15.66)      | -0.54 (-1.06, -0.01)    |
| Dose Reduction for Antibacterials     | <50                      | 12,136 (0.0372)    | 10,916 (0.0335)    | -1,220 (-3,611, 1,171)       | -10.05 (-29.53, 9.42)   |
| Eligible for Kidney Transplant        | <20                      | 63,839 (0.196)     | 54,926 (0.168)     | -8,913 (-17,561, -264.21)    | -13.96 (-26.26, -1.66)  |
| Dose Reduction for Anticoagulants     | <30                      | 6,774 (0.0208)     | 6,774 (0.0208)     | —                            | —                       |
| Dose Reduction for Diuretics          | <30                      | 16,395 (0.0503)    | 11,453 (0.0351)    | -4,942 (-9,780, -104.81)     | -30.14 (-58.23, -2.06)  |
| Pre-emptive Arteriovenous Fistula     | <18                      | 48,030 (0.147)     | 44,851 (0.138)     | -3,179 (-6,930, 572.07)      | -6.62 (-15.29, 2.05)    |
| Dose Reduction for Statins            | <30                      | 5,997 (0.0184)     | 3,875 (0.0119)     | -2,122 (-5,063, 820.01)      | -35.38 (-90.27, 19.51)  |

### I. Among Asian/Other Adults, from 2006 MDRD

| Implication                           | GFR Thresholds           | 2006 MDRD          | 2021 CKD-EPI       | Difference                    | % Change                 |
|---------------------------------------|--------------------------|--------------------|--------------------|-------------------------------|--------------------------|
|                                       | <i>ml/min/1.73 m.sq.</i> | <i>no. (%)</i>     | <i>no. (%)</i>     | <i>no. (95% CI)</i>           | <i>% (95% CI)</i>        |
| Chronic Kidney Disease Diagnosis      | <60                      | 2,090,783 (12.682) | 1,880,248 (11.405) | -210,535 (-284,827, -136,243) | -10.07 (-13.58, -6.56)   |
| Ineligible to Donate Kidney           | <60                      | 4,073,108 (24.706) | 3,953,683 (23.982) | -119,425 (-167,722, -71,127)  | -2.93 (-4.09, -1.77)     |
| Dose Reduction for Any Drug           | <30, <45, <50, <60       | 257,510 (1.562)    | 182,467 (1.107)    | -75,043 (-115,295, -34,790)   | -29.14 (-41.26, -17.03)  |
| Medical Nutrition Therapy Covered     | 13-50                    | 217,194 (1.317)    | 150,305 (0.912)    | -66,889 (-105,338, -28,440)   | -30.8 (-45.11, -16.48)   |
| Dose Reduction for ACE Inhibitors     | <50                      | 75,777 (0.460)     | 46,317 (0.281)     | -29,460 (-56,502, -2,418)     | -38.88 (-63.52, -14.24)  |
| Dose Reduction for Opioids            | <60                      | 77,333 (0.469)     | 55,673 (0.338)     | -21,659 (-43,966, 647.75)     | -28.01 (-52.21, -3.8)    |
| Dose Reduction for Antihyperglycemics | <30, <50, <60            | 42,355 (0.257)     | 25,474 (0.155)     | -16,881 (-32,478, -1,285)     | -39.86 (-69.44, -10.27)  |
| Dose Reduction for ARBs               | <45                      | 56,124 (0.340)     | 56,124 (0.340)     | —                             | —                        |
| Dose Reduction for Anticonvulsants    | <60                      | 35,038 (0.213)     | 24,911 (0.151)     | -10,128 (-21,944, 1,689)      | -28.91 (-58.56, 0.75)    |
| Dose Reduction for Beta-Blockers      | <50                      | 30,139 (0.183)     | 18,850 (0.114)     | -11,289 (-21,925, -653.92)    | -37.46 (-64.97, -9.94)   |
| Kidney Disease Education Covered      | 15-29                    | 35,719 (0.217)     | 20,151 (0.122)     | -15,568 (-34,246, 3,111)      | -43.58 (-84.28, -2.89)   |
| Nephrologist Referral                 | <30                      | 449,204 (2.725)    | 434,568 (2.636)    | -14,636 (-31,233, 1,962)      | -3.26 (-6.85, 0.34)      |
| Dose Reduction for Antibacterials     | <50                      | 0 (0.000)          | 0 (0.000)          | —                             | —                        |
| Eligible for Kidney Transplant        | <20                      | 33,011 (0.200)     | 28,935 (0.176)     | -4,076 (-9,792, 1,641)        | -12.35 (-29.52, 4.83)    |
| Dose Reduction for Anticoagulants     | <30                      | 7,270 (0.0441)     | 2,117 (0.0128)     | -5,153 (-15,254, 4,947)       | -70.89 (-128.09, -13.68) |
| Dose Reduction for Diuretics          | <30                      | 20,792 (0.126)     | 18,559 (0.113)     | -2,232 (-6,608, 2,143)        | -10.74 (-32.5, 11.02)    |
| Pre-emptive Arteriovenous Fistula     | <18                      | 28,935 (0.176)     | 27,537 (0.167)     | -1,398 (-4,137, 1,342)        | -4.83 (-14.52, 4.86)     |
| Dose Reduction for Statins            | <30                      | 6,596 (0.040)      | 6,596 (0.040)      | —                             | —                        |

### J. Among Asian/Other Adults, from 2009 CKD-EPI

| Implication                           | GFR Thresholds           | 2009 CKD-EPI       | 2021 CKD-EPI       | Difference                   | % Change                 |
|---------------------------------------|--------------------------|--------------------|--------------------|------------------------------|--------------------------|
|                                       | <i>ml/min/1.73 m.sq.</i> | <i>no. (%)</i>     | <i>no. (%)</i>     | <i>no. (95% CI)</i>          | <i>% (95% CI)</i>        |
| Chronic Kidney Disease Diagnosis      | <60                      | 1,985,416 (12.043) | 1,880,248 (11.405) | -105,168 (-146,894, -63,442) | -5.3 (-7.39, -3.2)       |
| Ineligible to Donate Kidney           | <60                      | 4,004,566 (24.290) | 3,953,683 (23.982) | -50,883 (-78,982, -22,784)   | -1.27 (-1.97, -0.57)     |
| Dose Reduction for Any Drug           | <30, <45, <50, <60       | 231,695 (1.405)    | 182,467 (1.107)    | -49,227 (-81,485, -16,970)   | -21.25 (-33.28, -9.21)   |
| Medical Nutrition Therapy Covered     | 13-50                    | 208,585 (1.265)    | 150,305 (0.912)    | -58,280 (-93,297, -23,263)   | -27.94 (-41.87, -14.01)  |
| Dose Reduction for ACE Inhibitors     | <50                      | 72,895 (0.442)     | 46,317 (0.281)     | -26,578 (-53,024, -133.05)   | -36.46 (-61.95, -10.97)  |
| Dose Reduction for Opioids            | <60                      | 60,427 (0.367)     | 55,673 (0.338)     | -4,754 (-14,071, 4,563)      | -7.87 (-22.76, 7.03)     |
| Dose Reduction for Antihyperglycemics | <30, <50, <60            | 40,147 (0.244)     | 25,474 (0.155)     | -14,673 (-29,656, 311.03)    | -36.55 (-66.89, -6.2)    |
| Dose Reduction for ARBs               | <45                      | 56,124 (0.340)     | 56,124 (0.340)     | —                            | —                        |
| Dose Reduction for Anticonvulsants    | <60                      | 31,979 (0.194)     | 24,911 (0.151)     | -7,068 (-17,251, 3,114)      | -22.1 (-50.89, 6.69)     |
| Dose Reduction for Beta-Blockers      | <50                      | 24,241 (0.147)     | 18,850 (0.114)     | -5,391 (-11,754, 970.8)      | -22.24 (-44.48, -0.01)   |
| Kidney Disease Education Covered      | 15-29                    | 44,961 (0.273)     | 20,151 (0.122)     | -24,810 (-47,507, -2,113)    | -55.18 (-89.89, -20.48)  |
| Nephrologist Referral                 | <30                      | 451,632 (2.739)    | 434,568 (2.636)    | -17,064 (-34,006, -121.18)   | -3.78 (-7.39, -0.16)     |
| Dose Reduction for Antibacterials     | <50                      | 0 (0.000)          | 0 (0.000)          | —                            | —                        |
| Eligible for Kidney Transplant        | <20                      | 33,011 (0.200)     | 28,935 (0.176)     | -4,076 (-9,792, 1,641)       | -12.35 (-29.52, 4.83)    |
| Dose Reduction for Anticoagulants     | <30                      | 7,270 (0.0441)     | 2,117 (0.0128)     | -5,153 (-15,254, 4,947)      | -70.89 (-128.09, -13.68) |
| Dose Reduction for Diuretics          | <30                      | 20,792 (0.126)     | 18,559 (0.113)     | -2,232 (-6,608, 2,143)       | -10.74 (-32.5, 11.02)    |
| Pre-emptive Arteriovenous Fistula     | <18                      | 28,935 (0.176)     | 27,537 (0.167)     | -1,398 (-4,137, 1,342)       | -4.83 (-14.52, 4.86)     |
| Dose Reduction for Statins            | <30                      | 6,596 (0.040)      | 6,596 (0.040)      | —                            | —                        |

**A.** Changes to GFR-dependent clinical decisions for Black adults in NHANES 2001-2018 when computed using the 2021 CKD-EPI equation rather than the 2006 MDRD equation. Estimates are not survey-weighted. Clinical recommendations are primarily from the 2012 KDIGO Clinical Practice Guidelines, with some exceptions. Pre-emptive arteriovenous fistula practices and SGLT2 inhibitor guidelines were derived from the literature (see methods) and medical nutritional therapy and kidney disease education coverage were derived from the Medicare Part B Benefit Policy.

**B.** Same as table S-4A, but modeling a change from the 2009 CKD-EPI equation.

**C-D.** Same as table S-4A and S-4B, but among Non-Black Adults.

**E-F.** Same as table S-4A and S-4B, but among White Adults.

**G-H.** Same as table S-4A and S-4B, but among Hispanic Adults.

**I-J.** Same as table S-4A and S-4B, but among Asian/Other Adults.

Abbreviations: ACE: angiotensin-converting enzyme; ARB: angiotensin receptor blocker; CKD: chronic kidney disease; CKD-EPI: CKD Epidemiology Collaboration; eGFR: estimated glomerular filtration rate; KDIGO: Kidney Disease Improving Global Outcomes; MDRD: Modification of Diet in Renal Disease; NHANES: National Health and Nutrition Examination Survey.

Figure S-1. Secular trends in chronic kidney disease prevalence by race/ethnicity with new and prior GFR estimating equations, 2001-2018

A. Age-Adjusted Prevalence of CKD, from 2006 MDRD

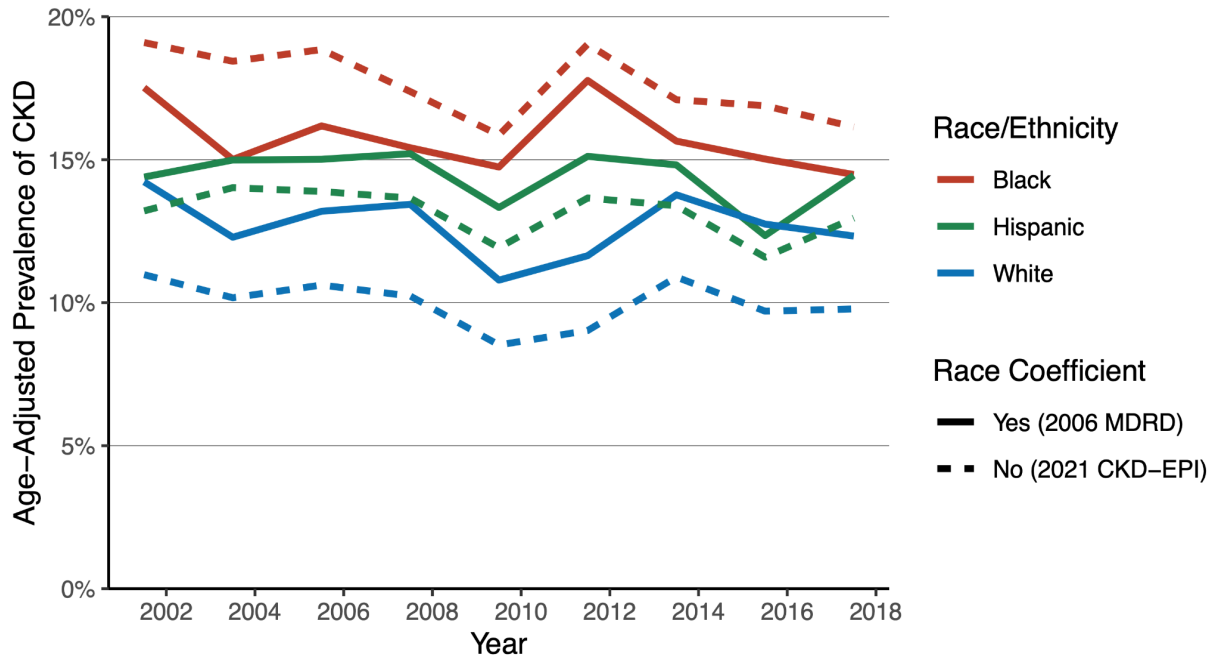

B. Age-Adjusted Prevalence of CKD, from 2009 CKD-EPI

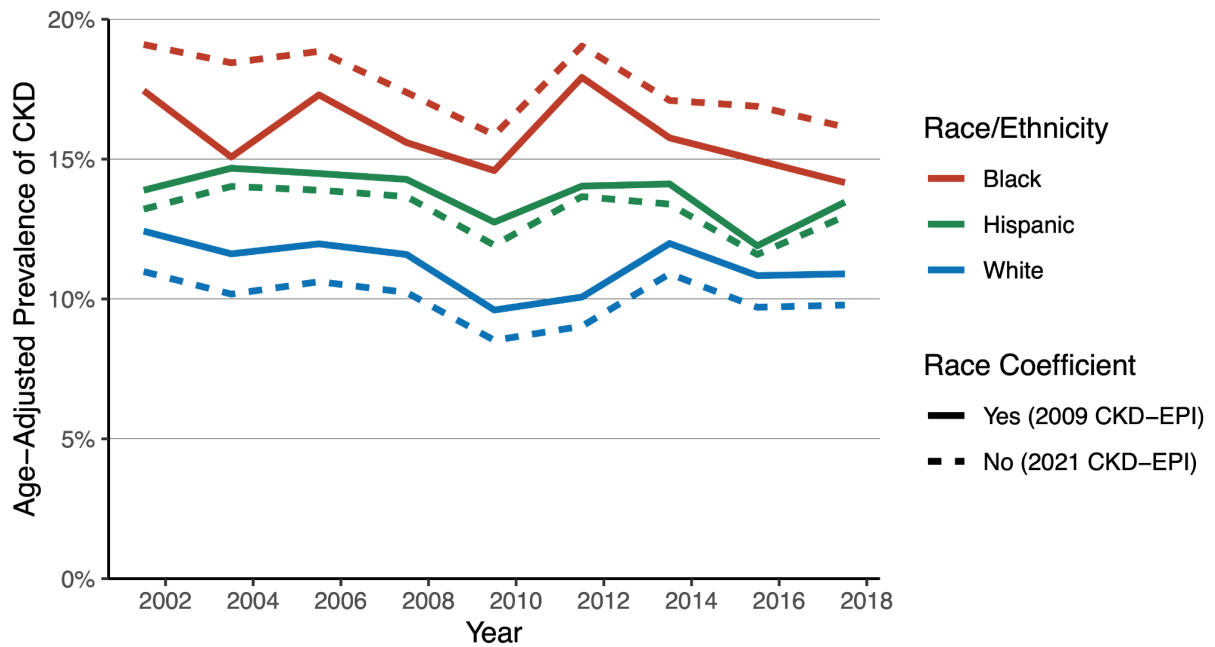

C. Crude Prevalence of CKD, from 2006 MDRD

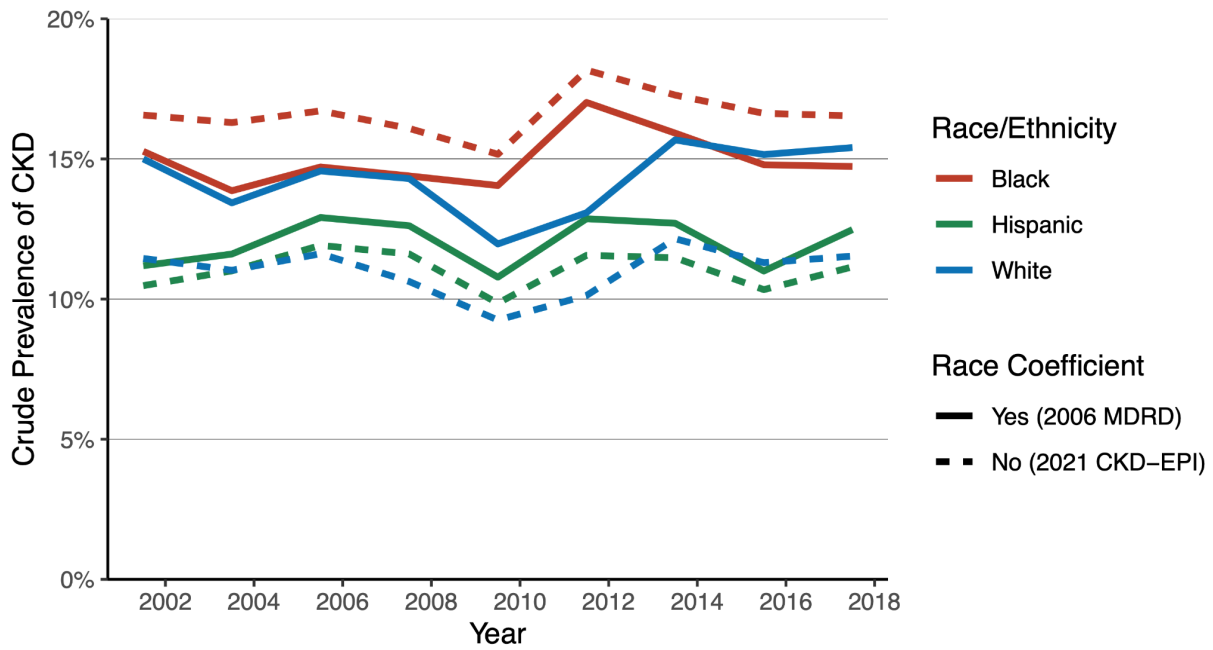

D. Crude Prevalence of CKD, from 2009 CKD-EPI

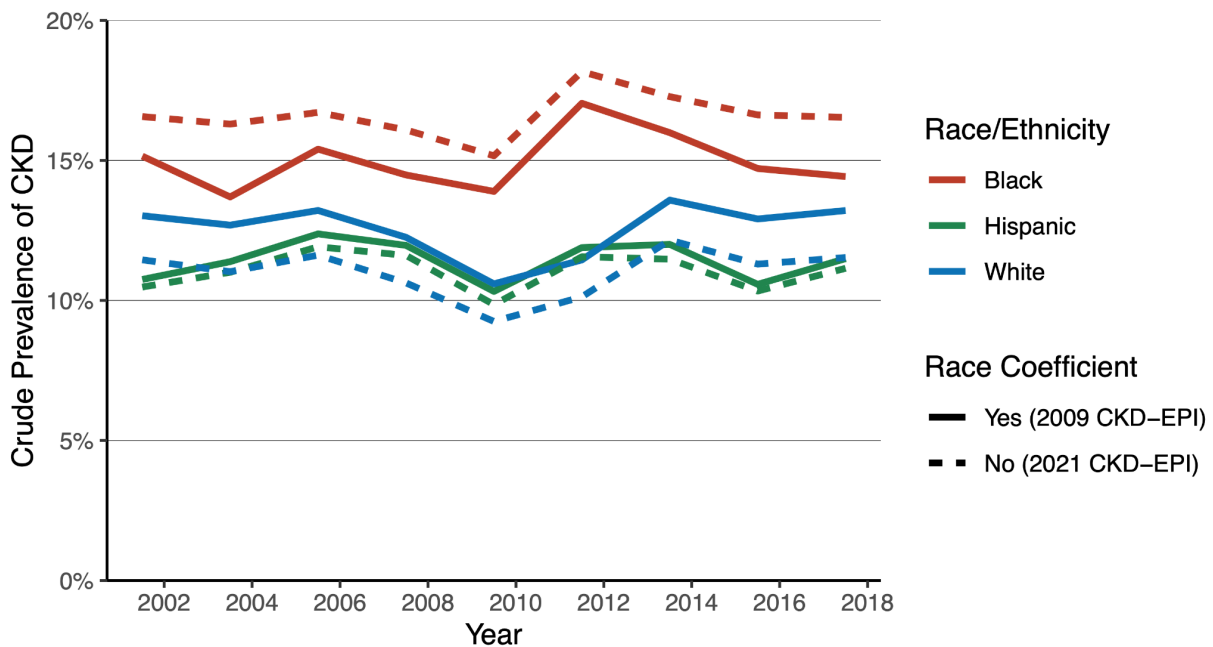

A. Age-adjusted chronic kidney disease (CKD) prevalence during National Health and Nutrition Examination Survey (NHANES) survey waves between 2001-2018, separated by race/ethnicity and estimated glomerular filtration rate (eGFR) equation. Chronic kidney disease was defined as eGFR less than 60 ml/min/1.73 m<sup>2</sup> or urine albumin-creatinine ratio > 30 mg/g without the chronicity requirement. Displayed eGFR equations include the 2006 Modification of Diet in Renal Disease (MDRD) equation and the 2021 CKD-Epidemiology Collaboration (CKD-EPI) equation. Age adjustment involves reweighting age groups using standard population distributions derived from the 2000 U.S. Census to control for changes in age distribution over time and between race/ethnicity groups. Asian/Other data were removed due to instability from low sample size.

B. Same as figure S-1A, but modeling a change from the 2009 CKD-EPI equation to the 2021 CKD-EPI equation.

C-D. Same as figure S-1A and S-1B, but displaying crude prevalence (no age adjustment).

**Figure S-2. Enrichment of Black participants in eGFR development data affects CKD prevalence and pharmacologic recommendations for both Black and Non-Black individuals**

**A. Effect on CKD prevalence**

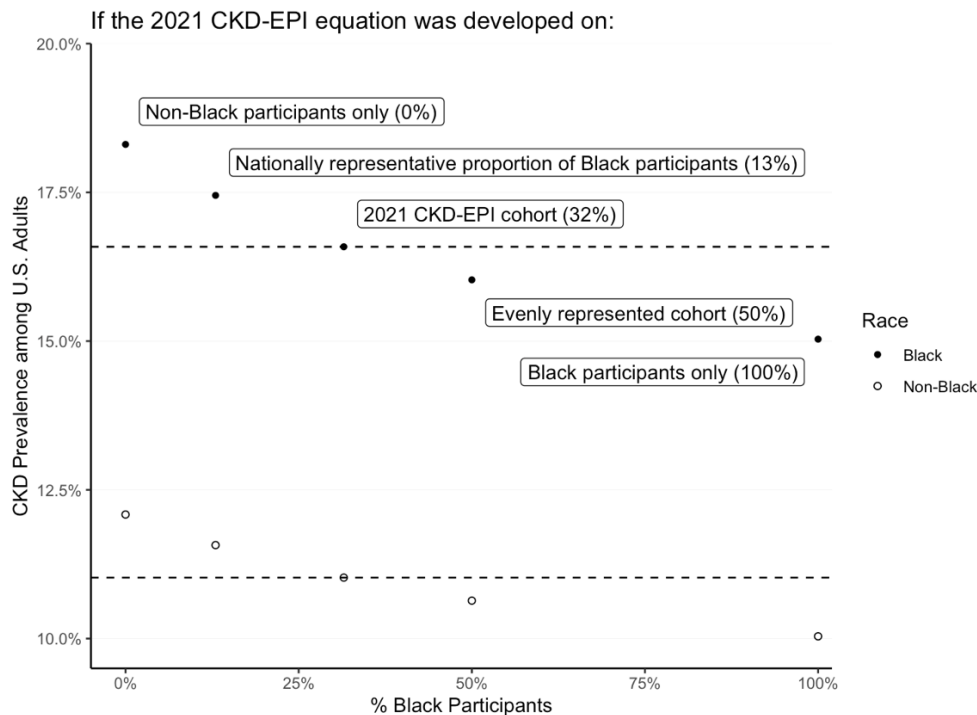

**B. Effect on recommended dose reduction**

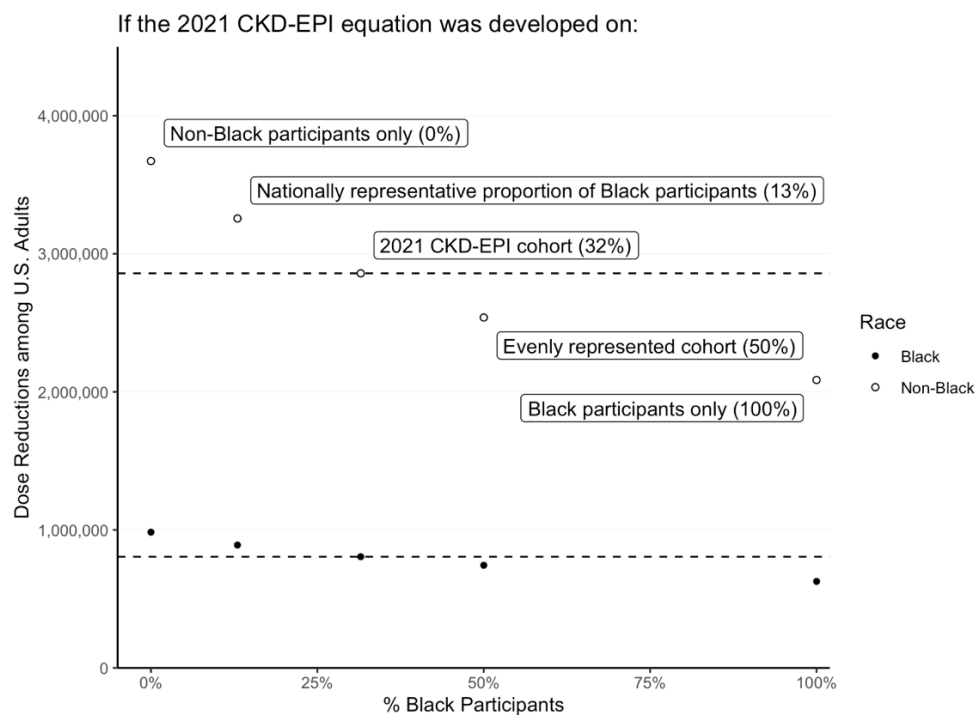

**A.** Prevalence of chronic kidney disease (CKD) and **B.** number of individuals with recommended dose reduction for a drug they are taking among both Black and Non-Black adults, shown against proportion of Black participants for five race-free equations. Candidate equations were developed using the CKD-Epidemiology Collaboration (CKD-EPI) cohort with non-Black individuals resampled to the given proportion of Black participants. Equations developed using greater proportions of Black participants resulted in lower prevalence of CKD and fewer individuals with recommended dose reductions among all race/ethnicity groups.
